# Supplementary material for: Synthesis and reactivity of the di(9-anthryl)methyl radical
Source: publisher site journal article supplement (doi:10.3762/bjoc.20.193), 2024-09-05
Supplement: Additional file 1 [file 1860-5397-20-193-S1.pdf]

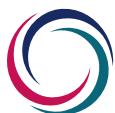

## Supporting Information

for

### Synthesis and reactivity of the di(9-anthryl)methyl radical

Tomohiko Nishiuchi, Kazuma Takahashi, Yuta Makihara and Takashi Kubo

*Beilstein J. Org. Chem.* **2024**, 20, 2254–2260. doi:10.3762/bjoc.20.193

**Synthetic procedure and compound characterization data ( $^1\text{H}$ ,  $^{13}\text{C}$  NMR, MS, melting point, X-ray crystallography) of new compounds. DFT calculation results and optimized structural Cartesian coordinates**

## *Contents*

|                                                                           |     |
|---------------------------------------------------------------------------|-----|
| 1. General information                                                    | S2  |
| 2. Synthesis                                                              | S2  |
| 3. Spin density map of the DAntM radical                                  | S4  |
| 4. Optimized structures and its relative Gibbs energies of DantM radicals | S5  |
| 5. Relative Gibbs energies potential curve of the DAntM radical           | S6  |
| 6. VT-ESR study to elucidate the dimerization in solution                 | S7  |
| 7. VT-NMR study to elucidate the dimerization in solution                 | S7  |
| 8. TLC analysis of decomposition of the DAntM radical                     | S8  |
| 9. Spin density map of anthroxyl radical <b>5</b>                         | S8  |
| 10. X-ray crystallography of anthroxyl radical <b>5</b>                   | S9  |
| 11. Cyclic voltammogram                                                   | S10 |
| 12. TD-DFT calculation of the DAntM radical                               | S10 |
| 13. TD-DFT calculation of the DAntM cation                                | S11 |
| 14. Optimized structure of the DAntM cation                               | S12 |
| 15. Electrostatic potential surface of the DAntM cation                   | S12 |
| 16. NMR spectra                                                           | S13 |
| 17. Cartesian coordinates of optimized structures                         | S17 |
| 18. References                                                            | S22 |

## General Information

All experiments were performed under nitrogen atmosphere. Anhydrous hexane and THF was purchased and used without further purification for reactions. Column chromatography was performed with silica gel [Silica gel 60 (MERCK)].  $^1\text{H}$  NMR and  $^{13}\text{C}$  NMR spectra were recorded on JEOL ECS-400 spectrometer. APCI-MS spectra were recorded on a Bruker micrOTOF II spectrometer. The UV-vis spectra were recorded on JASCO V-770 spectrophotometer. The ESR spectrum was recorded on JEOL JES-RE1X spectrometer. Cyclic voltammetric measurement was recorded on a BAS Model 612D electrochemical analyzer. The cyclic voltammogram was recorded with a glassy carbon working electrode and a Pt counter electrode in dichloromethane containing 0.1 M  $n\text{-Bu}_4\text{NPF}_6$  as a supporting electrolyte. The experiment employed an Ag/AgNO<sub>3</sub> reference electrode, and was done under argon atmosphere at room temperature.

**Computational methods.** All DFT calculations were performed with the Gaussian 16 program. For structural optimization, (U)B3LYP-D3/6-31G\*\* level of theory was used. Spin density of DAntM radical and anthroxyl radical were calculated using optimized structure with UBLYP/6-31G\*\* level of theory. TD-DFT calculations were performed using optimized structure with (U)CAM-B3LYP/6-31G\*\* level of theory.

## Synthesis

### Synthesis of compound 3

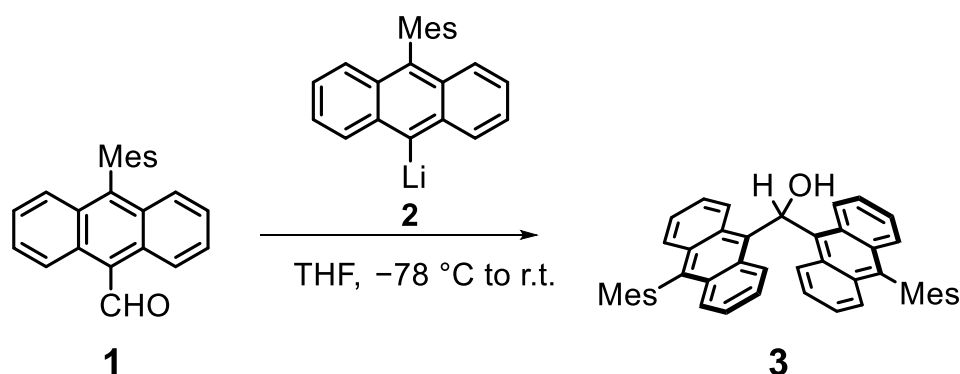

To a solution of 9-bromo-10-mesitylanthracene (751 mg, 2.00 mmol) in THF (10 ml) was added  $n\text{-BuLi}$  (1.6 M hexane solution, 1.25 ml, 2.00 mmol) at  $-78\text{ }^{\circ}\text{C}$ . After stirring for 30 min at same temperature, compound **1**<sup>[S1]</sup> (324 mg, 1.00 mmol) was added and stirred for 12 h at room temperature. The reaction was quenched by water, and extracted with dichloromethane and washed with brine. After removal of the solvent *in vacuo*, the crude material was subjected to column chromatography on silica gel (dichloromethane : hexane = 1 : 1) to afford the title compound **3** (365 mg, 0.59 mmol, 59%) as yellow solid.; Mp:  $198\text{--}200\text{ }^{\circ}\text{C}$  (dec.).  $^1\text{H}$  NMR (400 MHz,  $\text{CDCl}_3$ )  $\delta$  8.71 (d,  $J = 3.20\text{ Hz}$ , 1H), 8.58 (dd,  $J = 7.60\text{ Hz}$ ,  $J = 1.60\text{ Hz}$ , 4H), 7.52 (m, 4H), 7.21 (m, 8H), 7.10 (s, 4H), 2.98 (d,  $J = 3.60\text{ Hz}$ , 1H), 2.54 (s, 6H), 1.73 (s, 12H);  $^{13}\text{C}$  NMR (100 MHz,  $\text{CDCl}_3$ )  $\delta$  137.83, 137.43, 137.18, 134.95, 134.25, 130.04, 129.93, 128.27, 126.89, 125.71, 125.37, 124.94, 73.16, 21.24, 19.94. HR-MS (APCI) Calcd for  $\text{C}_{47}\text{H}_{40}\text{O}$  [ $M^+ + \text{H}$ ]:  $m/z$  621.3152, Found: 621.3152.

## Generation of DAntM radical and elucidation of the decomposition pathway

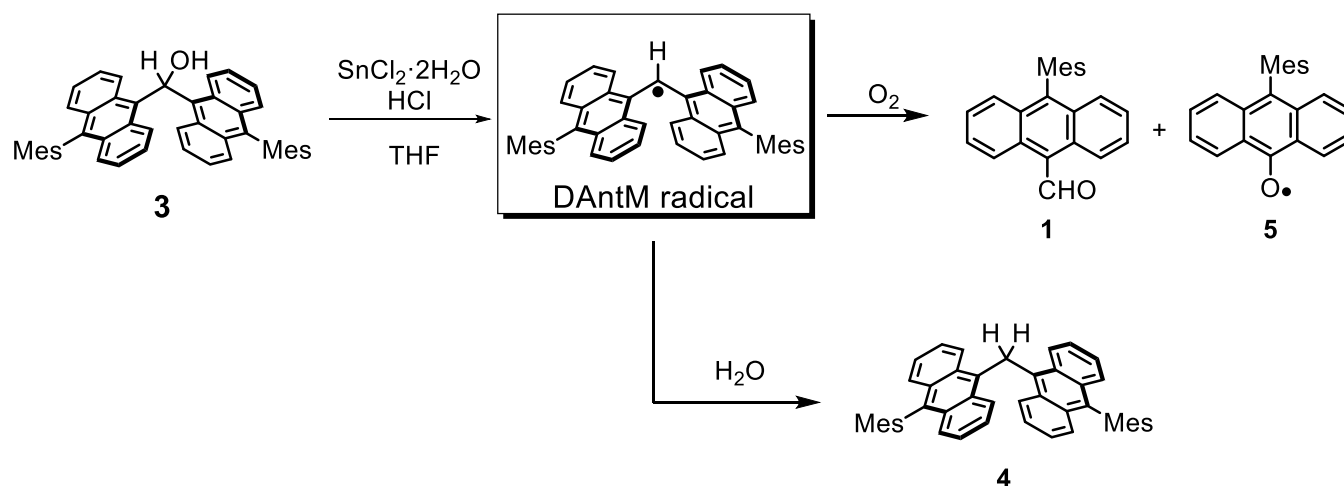

To a solution of compound **3** (200 mg, 0.320 mmol) and stannous chloride dihydrate (109 mg, 0.480 mmol) in THF (10 ml) under nitrogen atmosphere was added 12 M hydrogen chloride (several drops) and stirred for 1 h at room temperature. After exposing air for 30 min, the reaction was quenched by water, and extracted with dichloromethane and washed with brine. After removal of the solvent *in vacuo*, the crude material was subjected to column chromatography on silica gel (dichloromethane : hexane = 1 : 2) to afford compound **1** (66.3 mg, 0.204 mmol, 64%) as yellow solid, and compound **4** (26.1 mg, 0.043 mmol, 13%) as pale yellow solid. Compound **5** was isolated by recrystallization from dichloromethane, hexane, and small amount of pyridine (46.5 mg, 0.150 mmol, 47%).

To measure the ESR spectrum, an aliquot of the solution was picked and it was evaporated in the ESR tube. Degassed toluene was added to the ESR tube and freeze-pump-thaw cycling was conducted for five times. To measure the UV-vis spectrum, aliquot of the solution was picked and diluted into degassed toluene in UV cell.

Compound **1**<sup>[S1]</sup>:  $^1\text{H}$  NMR (400 MHz,  $\text{CDCl}_3$ )  $\delta$  11.61 (s, 1H), 9.04 (d,  $J = 9.20$  Hz, 2H), 7.66 (dd,  $J = 6.80$  Hz,  $J = 1.20$  Hz, 2H), 7.57 (d,  $J = 8.40$  Hz, 2H), 7.40 (dd,  $J = 6.80$  Hz,  $J = 1.20$  Hz, 2H), 7.10 (s, 2H), 2.46 (s, 3H), 2.54 (s, 3H), 1.69 (s, 6H);  $^{13}\text{C}$  NMR (100 MHz,  $\text{CDCl}_3$ )  $\delta$  193.38, 145.12, 137.77, 136.89, 134.02, 131.92, 129.44, 128.81, 128.41, 126.94, 125.90, 124.72, 123.80, 21.22, 19.88.

Compound **4**: Mp: 243-245°C (dec.).  $^1\text{H}$  NMR (400 MHz,  $\text{CDCl}_3$ )  $\delta$  8.32 (dd,  $J = 8.00$  Hz,  $J = 1.60$  Hz, 4H), 7.49 (m, 4H), 7.21 (m, 8H), 7.09 (s, 4H), 6.15 (s, 2H), 2.45 (s, 6H), 1.72 (s, 12H);  $^{13}\text{C}$  NMR (100 MHz,  $\text{CDCl}_3$ )  $\delta$  137.61, 137.05, 135.45, 135.08, 134.20, 130.40, 129.80, 128.23, 126.92, 125.32, 124.95, 124.92, 29.5, 21.26, 19.92. HR-MS (APCI) Calcd for  $\text{C}_{47}\text{H}_{40}$  [ $M^+ + \text{H}$ ]:  $m/z$  605.3203, Found: 605.3202.

Compound **5**: Mp: 216-217°C. MS (APCI):  $m/z$  312 [ $M^+ + \text{H}$ ].

## Generation of the DAntM cation

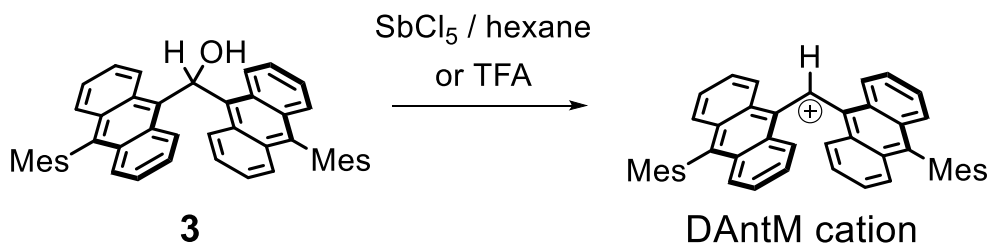

To a suspension of compound **3** (10 mg, 0.025 mmol) in hexane (1 ml) was added a solution of pentachloroantimonate (1.0 M in CH<sub>2</sub>Cl<sub>2</sub>, 0.1 ml), affording a black solid of DAntM cation. After washed the solid by hexane, residual hexane was evaporated. This solid was used for CV measurement. Due to the highly hygroscopic nature of DAntM cation, melting point measurement was difficult. To measure the UV-vis or NMR spectra of DAntM cation, compound **3** was dissolved in TFA or TFA-*d*, respectively, for *in situ* generation. From the NMR spectra, DAntM cation is quantitatively generated from **3** in TFA-*d*. <sup>1</sup>H NMR (400 MHz, TFA-*d*) δ 10.87 (s, 1H), 8.41 (d, *J* = 8.4 Hz, 4H), 7.81 (dd, *J* = 8.4 Hz, *J* = 0.8 Hz, 4H), 7.62 (m, 4H), 7.54 (m, 4H), 7.16 (s, 4H), 2.42 (s, 6H), 1.84 (s, 12H); <sup>13</sup>C NMR (100 MHz, TFA-*d*) δ 169.03, 158.04, 142.79, 138.20, 138.04, 137.46, 136.71, 134.59, 134.19, 133.17, 131.36, 130.88, 128.04, 21.90, 20.67.

## Spin density map of the DAntM radical

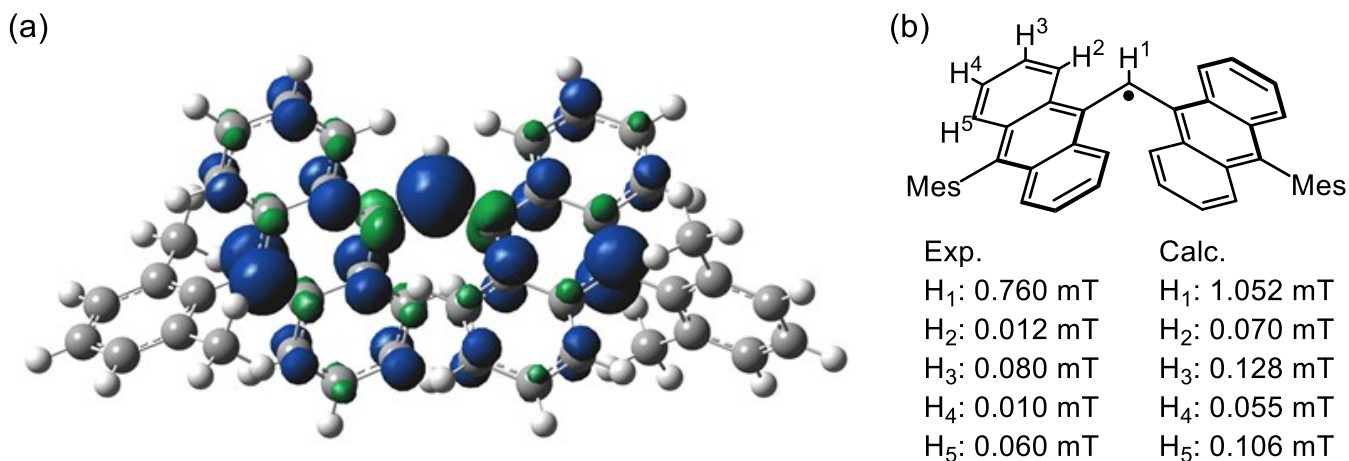

Figure S1. (a) Calculated spin distribution of DAntM radical with spin localization at the central sp<sup>2</sup> carbon. To reduce the computational costs, one methyl substituent of the mesityl group at 4-position was replaced by hydrogen. (b) Experimental and calculated hyperfine coupling constant of **5**. Calculations were conducted by UBLYP/6-31G\*\*//UB3LYP-D3/6-31G\*\* level of theory.

## Optimized structures and its relative Gibbs energies of DAntM radicals

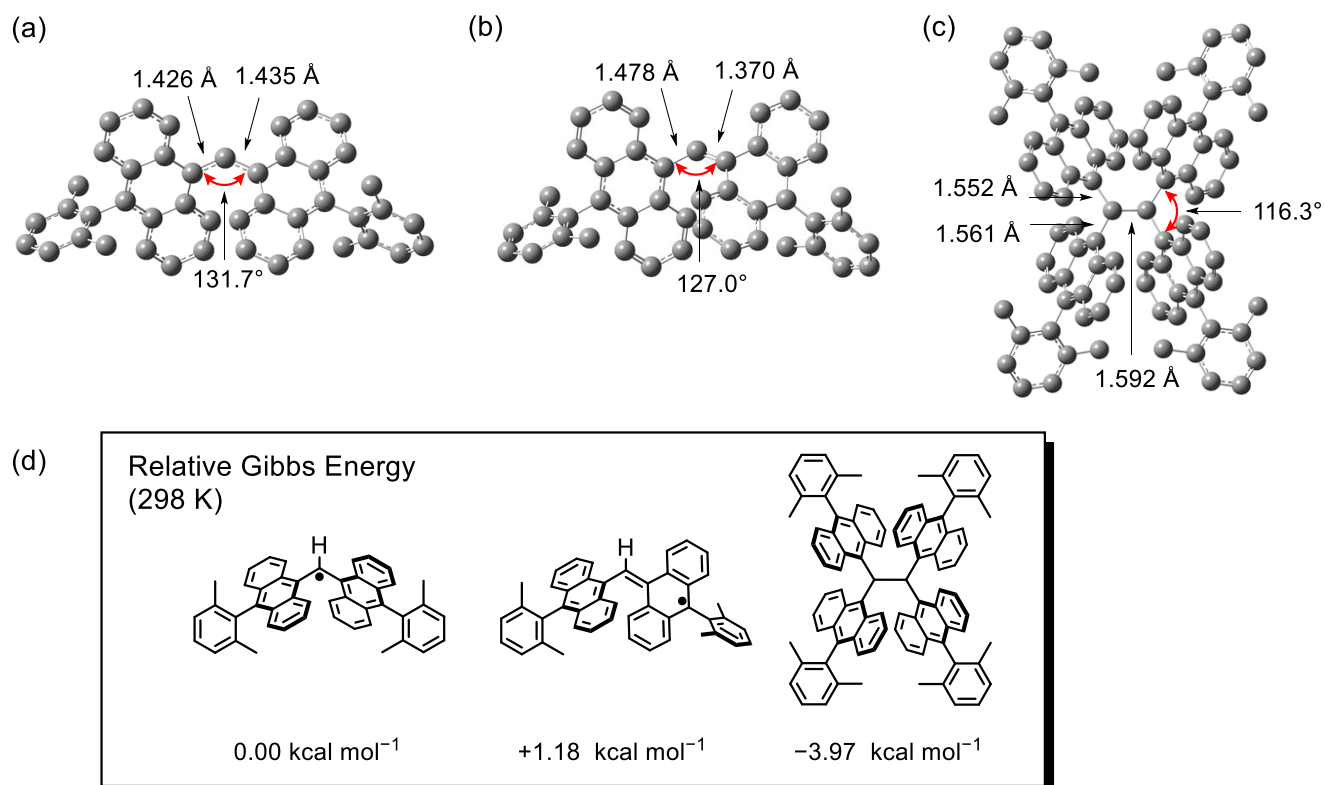

Figure S2. (a) Optimized structure and structural parameters of a DAntM radical with spin localization at the central  $sp^2$  carbon.

(b) Optimized structure and structural parameters of a DAntM radical with spin localization on the right anthryl group.

(c) Optimized structure and structural parameters of the DAntM radical dimer. (d) Relative Gibbs energies (298 K) of above structures. To reduce the computational cost, one methyl substituent of the mesityl group at 4-position was replaced by hydrogen. Structural optimization were conducted by UB3LYP-D3/6-31G\*\* level of theory.

## Relative Gibbs energies potential curve of the DAntM radical

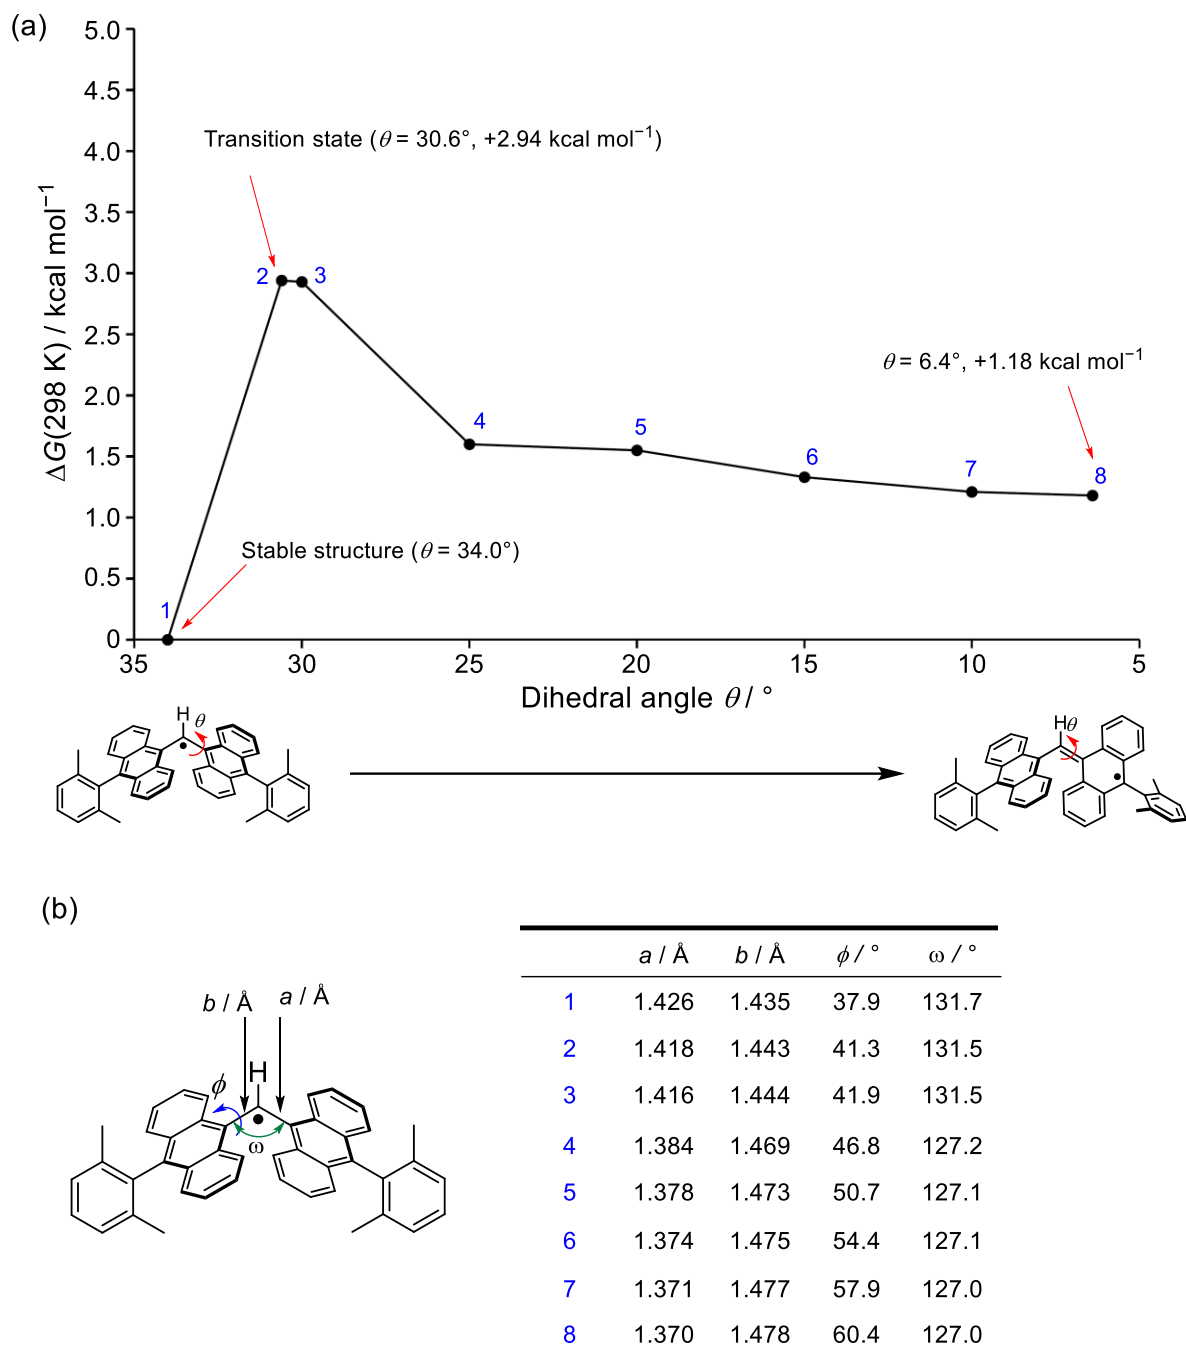

Figure S3. (a) Relative Gibbs energies potential curve of the DAntM radical toward dihedral angle of Ant unit. (b) Structural parameters, C-C bond lengths of  $a$  and  $b$ , dihedral angle  $\phi$  of another anthryl unit, and bond angle  $\omega$  in each optimized structures from 1 to 8.

## VT-ESR study to elucidate the dimerization in solution

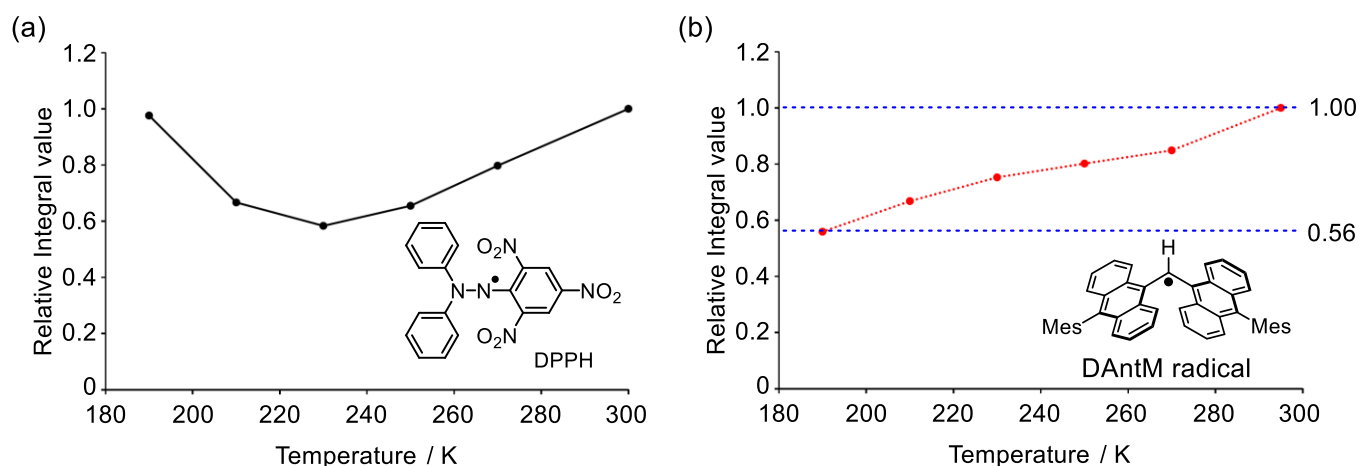

Figure S4. (a) Temperature dependency of the ESR peak integral of 2,2-diphenyl-1-picrylhydrazyl (DPPH) in toluene. (b) Temperature dependency of the ESR peak integral of the DAntM radical corrected by that of DPPH in toluene. Although DPPH is reported not to dimerize in solution, the ESR peak integral shows a temperature dependence due to the Curie law and sensitivity of the instrument;<sup>[S2]</sup> the relative peak integral decreases to about 0.6 at 230 K and then shows a reverse tendency to increase at lower temperature. Therefore, the dimerization of the DAntM radical was estimated by integral correction using DPPH. Based on these results, we concluded that the DAntM radical shows dimerization in solution.

## VT-NMR study to elucidate the dimerization in solution

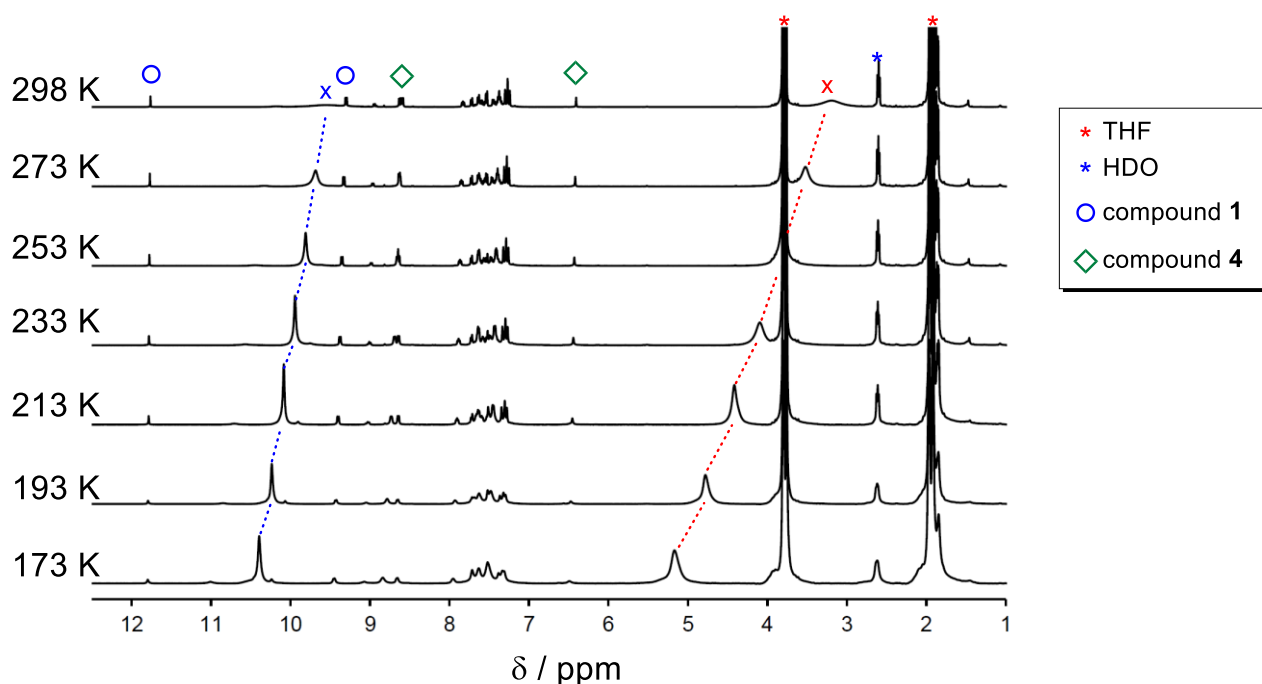

Figure S5. VT-<sup>1</sup>H NMR of DAntM radical from 298 K to 173 K measured by using THF-*d*<sub>8</sub>. For all temperature, decomposed materials of compound 1 (○) and 4 (◇) were observed. Although two broad signals at 9.8 ppm (x) and 3.3 ppm (x) at 298 K became sharper and shifted to lower magnetic field upon cooling temperature, they are unknown signals and the signals originating from dimer could not be observed probably due to the equilibrium between monomer radical and dimer even at low temperature.



## TLC analysis of decomposition of the DAntM radical

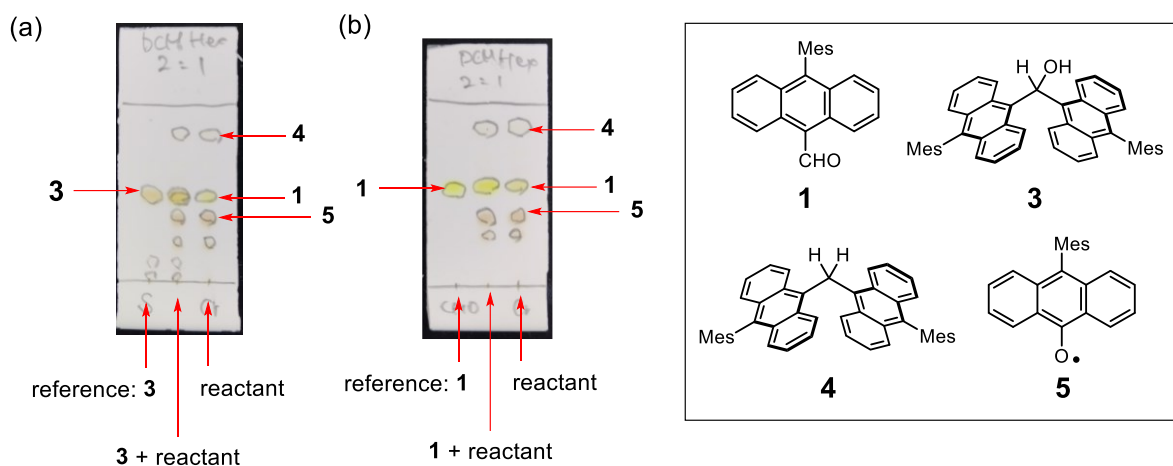

Figure S6. (a) TLC image of reference **3** (left) and reactant for generation of DAntM radical (right), (Developing solvent: dichloromethane : hexane = 2 : 1). In reactant, reference **3** (orange color) was consumed but yellow spot at almost identical  $R_f$  value was observed. (b) TLC image of reference **1** (left) and reactant for generation of DAntM radical (right), (Developing solvent: dichloromethane : hexane = 2 : 1). It is obvious that the compound **1** (yellow color) was generated from the reactant.

## Spin density map of anthroxyl radical **5**

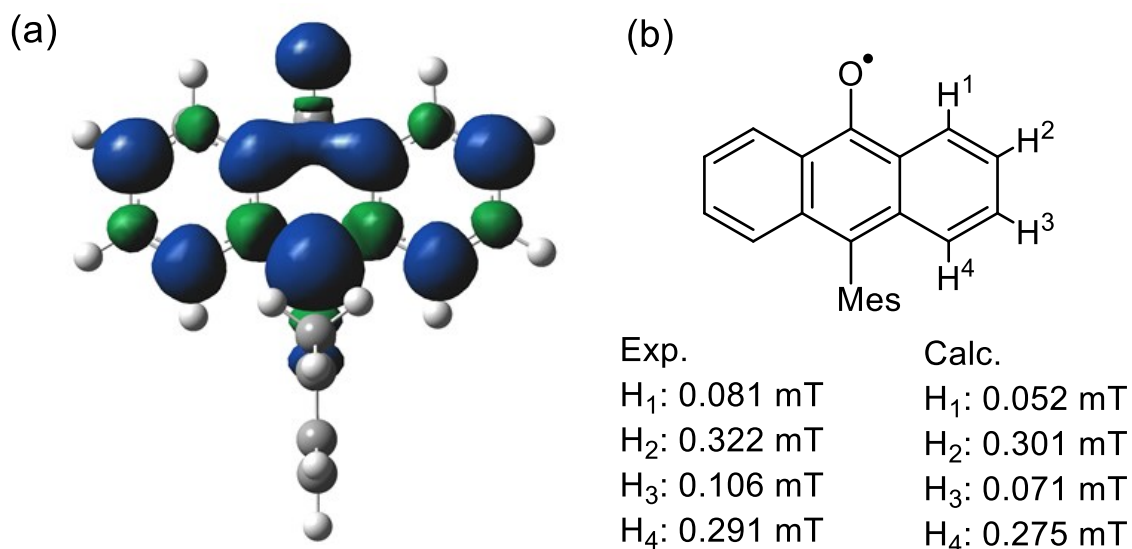

Figure S7. (a) Calculated spin distribution of anthroxyl radical **5**. To reduce the computational costs, one methyl substituent of the mesityl group at 4-position was replaced by hydrogen. (b) Experimental and calculated hyperfine coupling constant of **5**. Calculations were conducted by UBLYP/6-31G\*\*//UB3LYP-D3/6-31G\*\* level of theory.

## X-ray crystallography of anthroxyl radical **5**

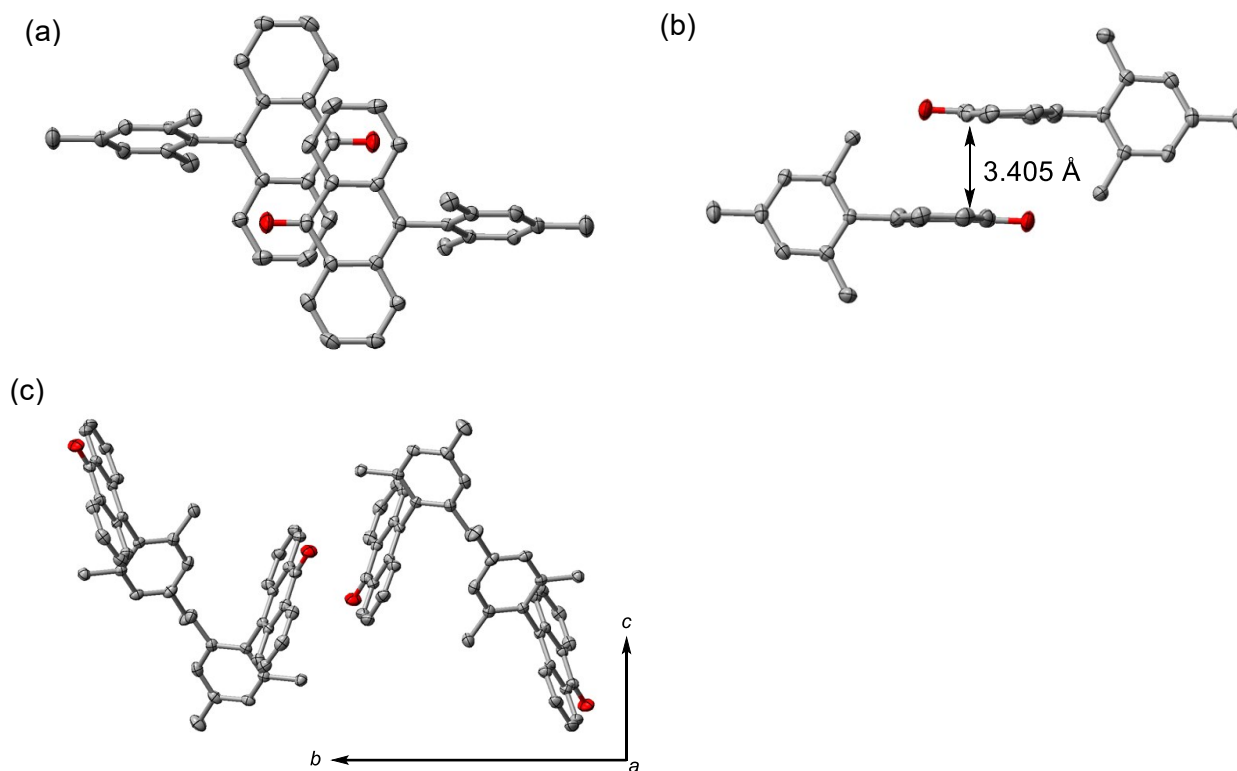

Figure S8. X-ray crystallography of anthroxyl radical **5**. (a) Top view of dimeric structure of **5**. (b) Side view. (c) Packing structure of **5**. Hydrogen atoms are omitted for clarity.

Table S1. Crystal data and structure refinement for **5**.

|                                                     |                                                                              |
|-----------------------------------------------------|------------------------------------------------------------------------------|
| CCDC number                                         | 2373408                                                                      |
| Empirical formula                                   | C <sub>23</sub> H <sub>19</sub> O                                            |
| Formula weight                                      | 311.38                                                                       |
| Temperature/K                                       | 120.15                                                                       |
| Crystal system                                      | monoclinic                                                                   |
| Space group                                         | <i>P</i> 2 <sub>1</sub> / <i>c</i>                                           |
| <i>a</i> /Å                                         | 8.7514(9)                                                                    |
| <i>b</i> /Å                                         | 22.1655(16)                                                                  |
| <i>c</i> /Å                                         | 9.2360(9)                                                                    |
| β/°                                                 | 113.649(12)                                                                  |
| Volume/Å <sup>3</sup>                               | 1641.1(3)                                                                    |
| Z                                                   | 4                                                                            |
| ρ <sub>calc</sub> /cm <sup>3</sup>                  | 1.260                                                                        |
| μ/mm <sup>-1</sup>                                  | 0.075                                                                        |
| F(000)                                              | 660.0                                                                        |
| Crystal size/mm <sup>3</sup>                        | 0.5 × 0.05 × 0.05                                                            |
| Radiation                                           | Mo Kα (λ = 0.71073)                                                          |
| 2θ range for data collection/°                      | 3.674 to 62.224                                                              |
| Index ranges                                        | -11 ≤ <i>h</i> ≤ 11, -29 ≤ <i>k</i> ≤ 30, -12 ≤ <i>l</i> ≤ 12                |
| Reflections collected                               | 19645                                                                        |
| Independent reflections                             | 4267 [ <i>R</i> <sub>int</sub> = 0.0333, <i>R</i> <sub>sigma</sub> = 0.0287] |
| Data/restraints/parameters                          | 4267/0/220                                                                   |
| Goodness-of-fit on <i>F</i> <sup>2</sup>            | 1.061                                                                        |
| Final <i>R</i> indexes [ <i>I</i> ≥ 2σ( <i>I</i> )] | <i>R</i> <sub>1</sub> = 0.0493, <i>wR</i> <sub>2</sub> = 0.1305              |
| Final <i>R</i> indexes [all data]                   | <i>R</i> <sub>1</sub> = 0.0637, <i>wR</i> <sub>2</sub> = 0.1378              |
| Largest diff. peak/hole / e Å <sup>-3</sup>         | 0.34/-0.23                                                                   |

## Cyclic voltammogram

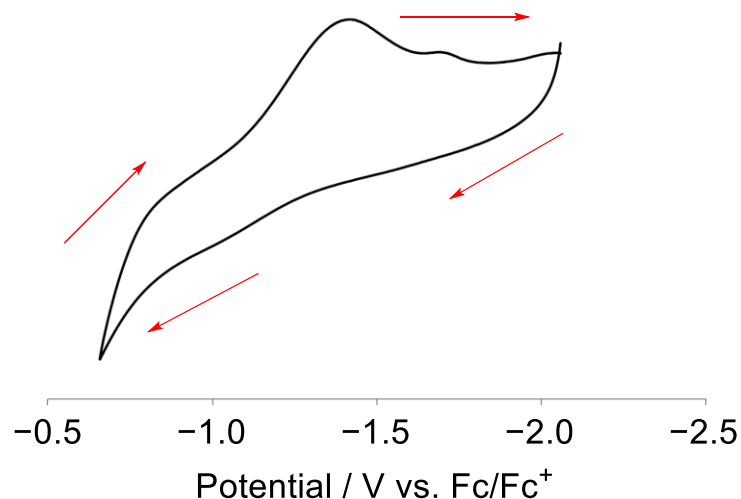

Figure S9. Cyclic voltammogram of the DAntM cation at negative potential field. Measurement conditions: 100 mM *n*-Bu<sub>4</sub>NPF<sub>6</sub> and 1 mM DAntM cation in CH<sub>2</sub>Cl<sub>2</sub>. Red arrows indicate the sweep direction.

## TD-DFT calculation of DAntM radical (UCAM-B3LYP/6-31G\*\*//B3LYP-D3/6-31G\*\*)

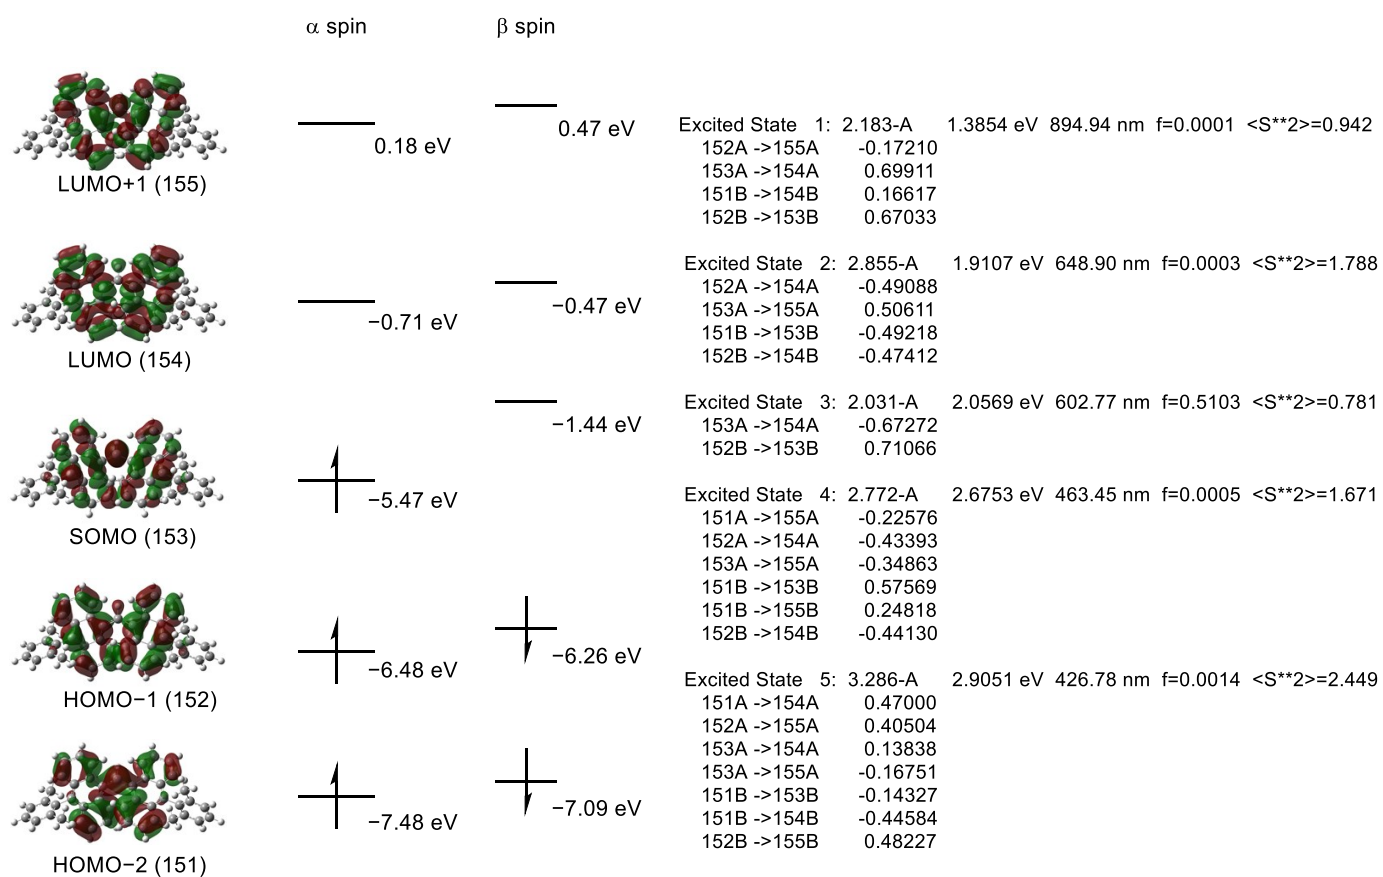

Figure S10. Frontier orbitals, energies, and transitions of the DAntM radical. To reduce the computational costs, one methyl substituent of the mesityl group at 4-position was replaced by hydrogen. Calculations were conducted by UCAM-B3LYP/6-31G\*\*//UB3LYP-D3/6-31G\*\* level of theory.

## TD-DFT calculation of the DAntM cation

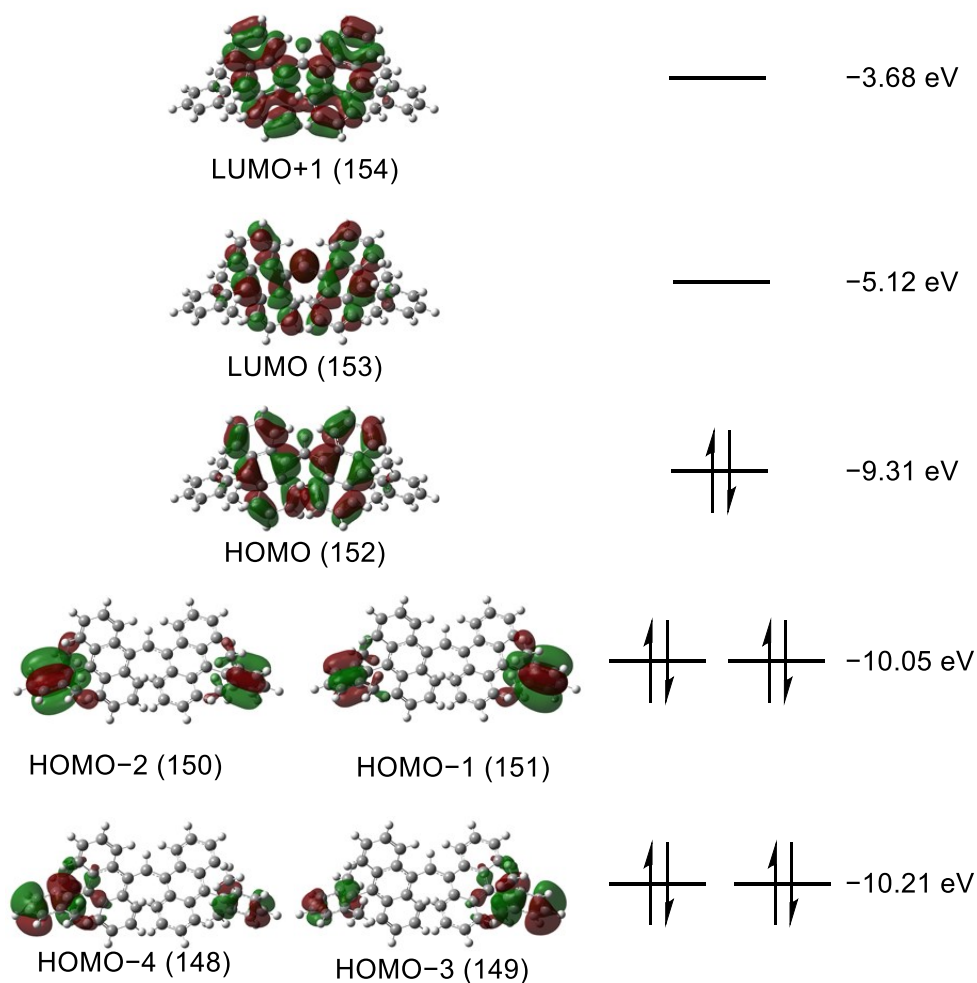

|                            |           |           |          |              |                            |           |           |          |
|----------------------------|-----------|-----------|----------|--------------|----------------------------|-----------|-----------|----------|
| Excited State 1: Singlet-A | 1.7245 eV | 718.94 nm | f=0.5695 | <S**2>=0.000 | Excited State 4: Singlet-A | 2.5671 eV | 482.97 nm | f=0.0003 |
| 152 ->153                  | 0.70237   |           |          |              | <S**2>=0.000               |           |           |          |
|                            |           |           |          |              | 148 ->153                  | -0.11583  |           |          |
| Excited State 2: Singlet-A | 2.5606 eV | 484.20 nm | f=0.0001 | <S**2>=0.000 | 149 ->153                  | 0.20343   |           |          |
| 147 ->153                  | -0.14797  |           |          |              | 150 ->153                  | -0.28531  |           |          |
| 148 ->153                  | -0.24169  |           |          |              | 150 ->154                  | 0.19947   |           |          |
| 148 ->154                  | 0.19590   |           |          |              | 151 ->153                  | 0.55347   |           |          |
| 149 ->153                  | 0.54917   |           |          |              |                            |           |           |          |
| 151 ->153                  | -0.21410  |           |          |              | Excited State 5: Singlet-A | 2.5673 eV | 482.93 nm | f=0.0002 |
| Excited State 3: Singlet-A | 2.5636 eV | 483.63 nm | f=0.0001 | <S**2>=0.000 | <S**2>=0.000               |           |           |          |
| 148 ->153                  | 0.54903   |           |          |              | 148 ->153                  | 0.23606   |           |          |
| 149 ->153                  | 0.24151   |           |          |              | 149 ->153                  | 0.12646   |           |          |
| 149 ->154                  | 0.19772   |           |          |              | 150 ->153                  | 0.53980   |           |          |
| 150 ->153                  | -0.25091  |           |          |              | 151 ->153                  | 0.28123   |           |          |
| 151 ->153                  | -0.10253  |           |          |              | 151 ->154                  | 0.19509   |           |          |

Figure S11. Frontier orbitals, energies, and transitions of the DAntM cation. To reduce the computational costs, one methyl substituent of the mesityl group at 4-position was replaced by hydrogen. Calculations were conducted by CAM-B3LYP/6-31G\*\*//B3LYP-D3/6-31G\*\* level of theory.

## Optimized structure of the DAntM cation

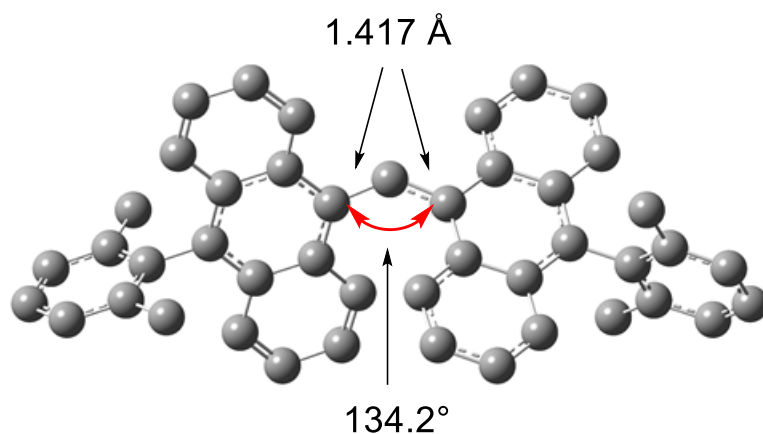

Figure S12. Optimized structure and structural parameters of DAntM cation. To reduce the computational costs, one methyl substituent of the mesityl group at 4-position was replaced by hydrogen. Calculations were conducted by B3LYP-D3/6-31G\*\* level of theory.

## Electrostatic potential surface of the DAntM cation

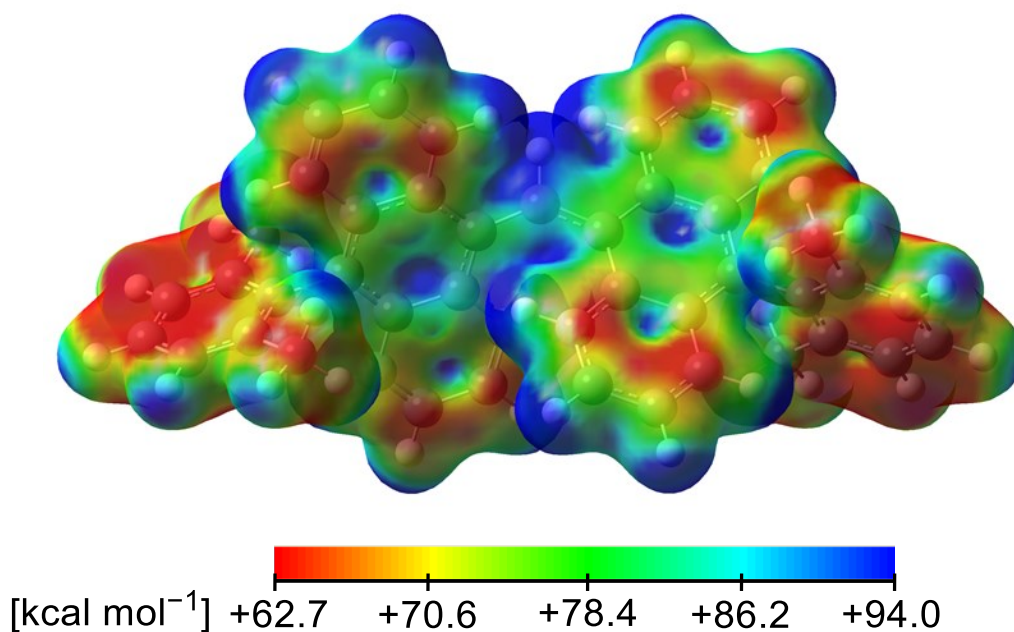

Figure S13. Electrostatic potential surface of the DAntM cation (B3LYP-D3/6-31G\*\*). Energy color range represents from +62.7 (red) to +94.0 (blue) kcal mol<sup>-1</sup>

# NMR spectra

$^1\text{H}$  NMR (400 MHz) of compound **3** ( $\text{CDCl}_3$ )

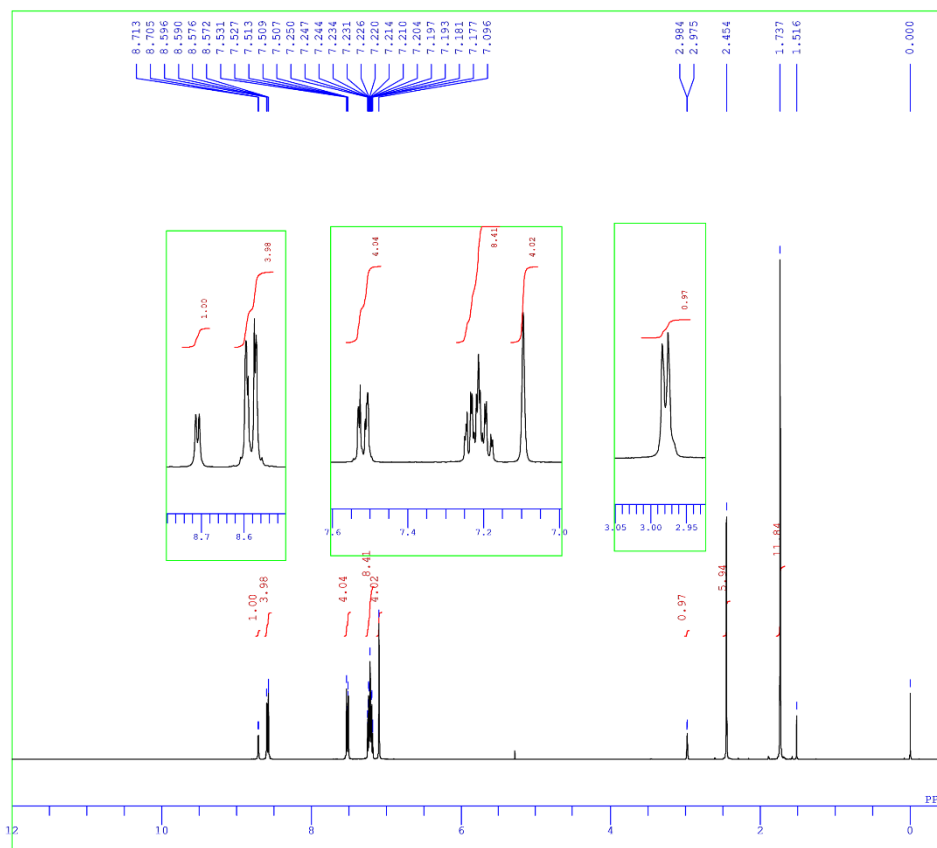

$^{13}\text{C}$  NMR (100 MHz) of compound **3** ( $\text{CDCl}_3$ )

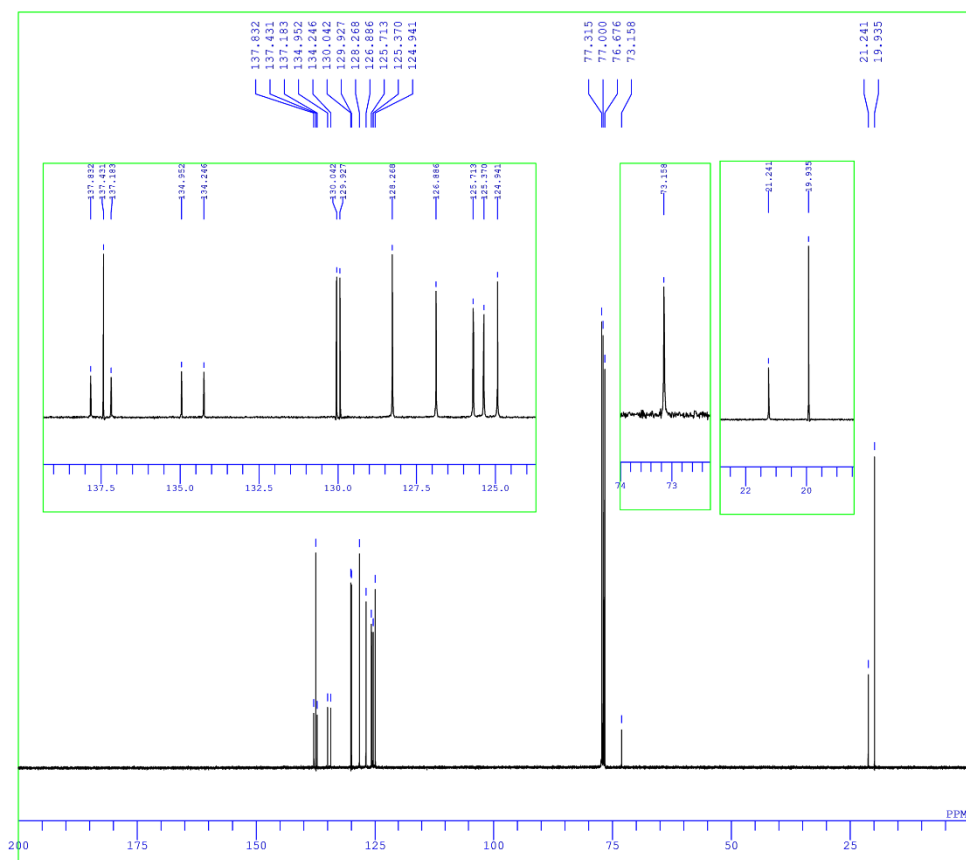

$^1\text{H}$  NMR (400 MHz) of compound **1** ( $\text{CDCl}_3$ )

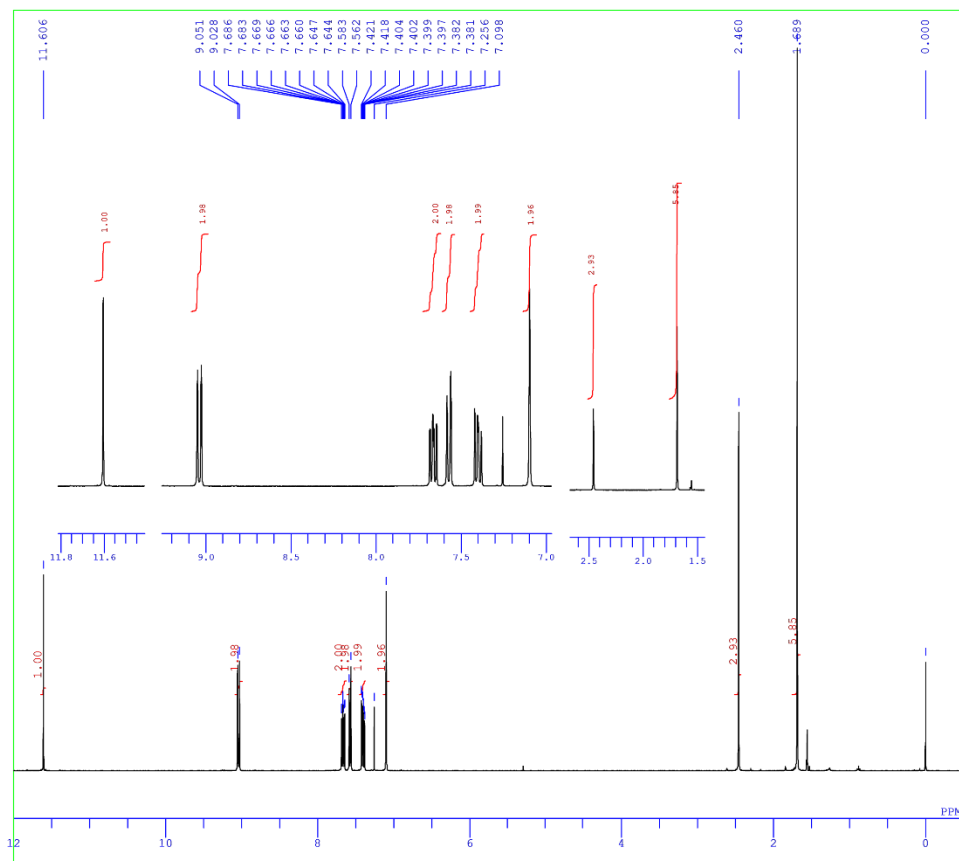

$^1\text{H}$  NMR (400 MHz) of compound **4** ( $\text{CDCl}_3$ )

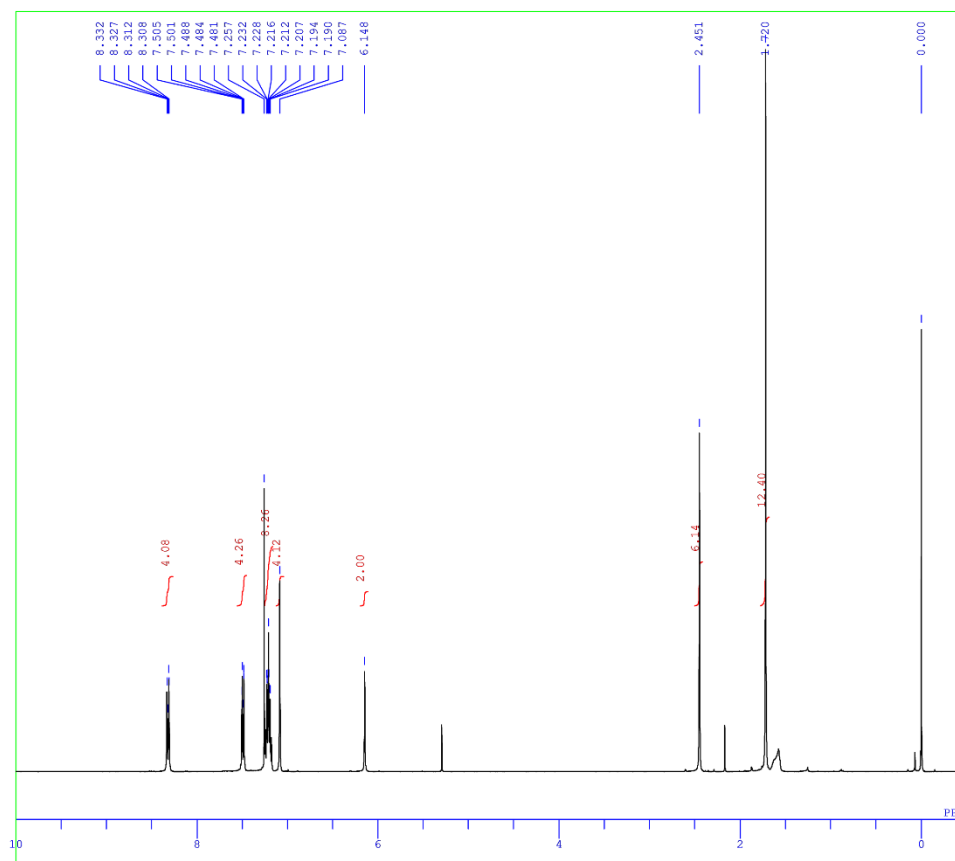

$^{13}\text{C}$  NMR (100 MHz) of compound **4** ( $\text{CDCl}_3$ )

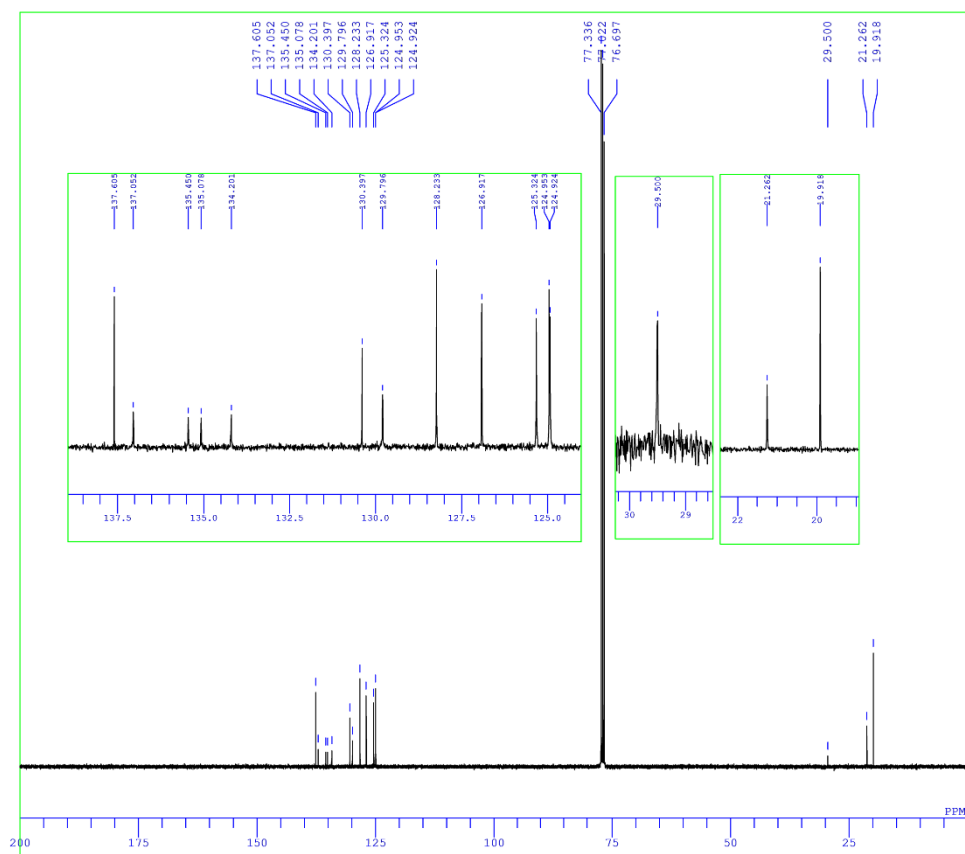



$^1\text{H}$  NMR (400 MHz) of compound DAntM cation ( $\text{TFA-d}$ )

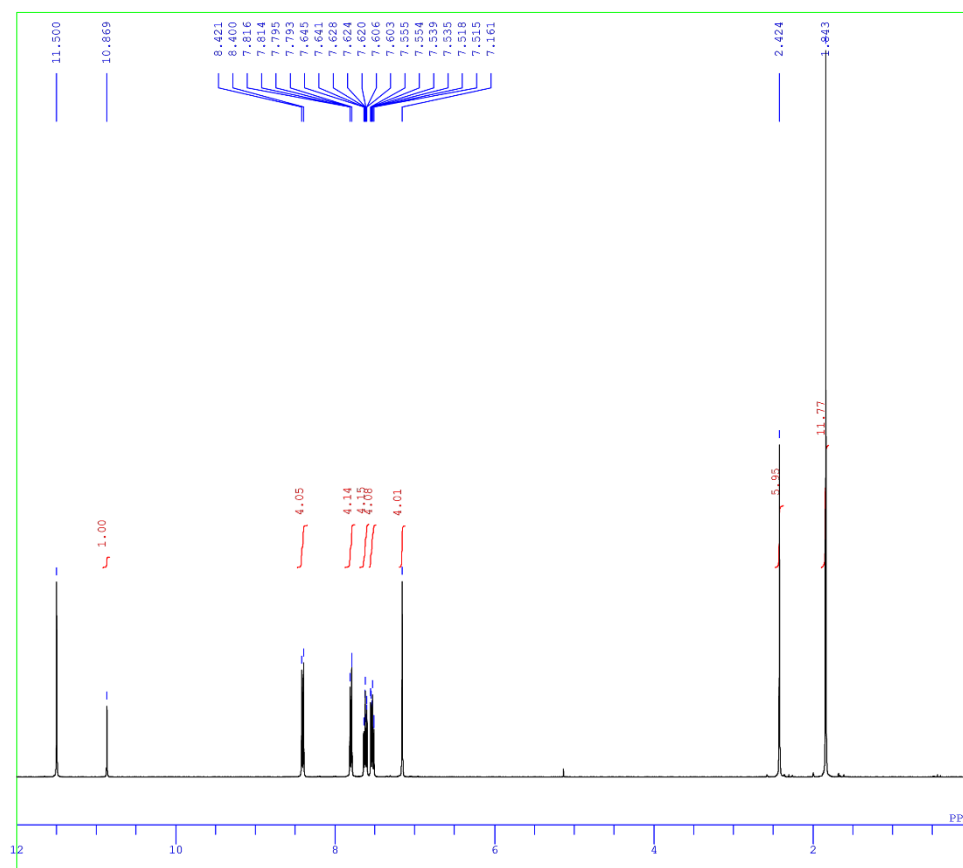

$^{13}\text{C}$  NMR (100 MHz) of compound DAntM cation ( $\text{TFA-d}$ )

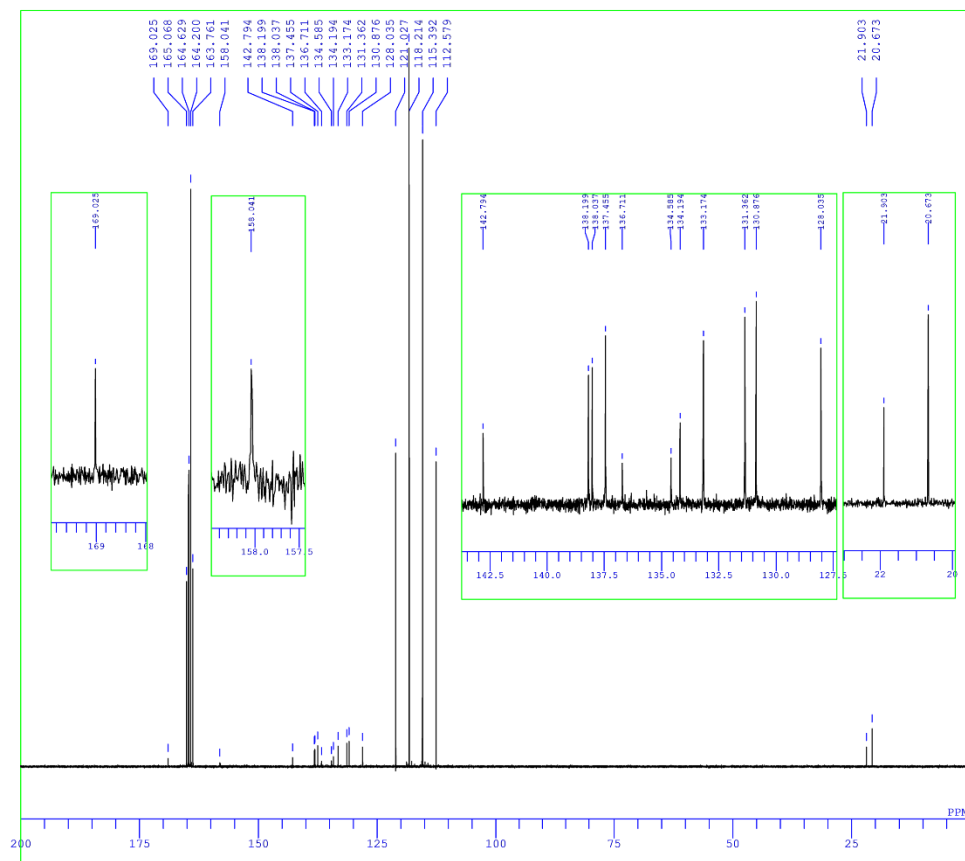

## Cartesian coordinates of optimized structures

Table S2. Cartesian coordinates of the DAntM radical (spin localization at the central  $sp^2$  carbon)

| Center<br>Number | Atomic<br>Number | Atomic<br>Type | Coordinates (Angstroms) |           |           | Center<br>Number | Atomic<br>Number | Atomic<br>Type | Coordinates (Angstroms) |           |           |
|------------------|------------------|----------------|-------------------------|-----------|-----------|------------------|------------------|----------------|-------------------------|-----------|-----------|
|                  |                  |                | X                       | Y         | Z         |                  |                  |                | X                       | Y         | Z         |
| 1                | 6                | 0              | -3.261607               | 3.618518  | 1.930141  | 41               | 6                | 0              | 5.776717                | -1.427605 | -0.916791 |
| 2                | 6                | 0              | -4.582034               | 3.125241  | 1.806423  | 42               | 6                | 0              | 4.814066                | -1.774661 | -2.027817 |
| 3                | 6                | 0              | -4.809636               | 1.952928  | 1.129991  | 43               | 6                | 0              | 5.821946                | 0.677383  | 2.283843  |
| 4                | 6                | 0              | -3.741933               | 1.225600  | 0.518535  | 44               | 6                | 0              | -5.786903               | 0.634488  | -2.320343 |
| 5                | 6                | 0              | -2.404558               | 1.751760  | 0.596192  | 45               | 6                | 0              | -4.838921               | -1.754620 | 2.039711  |
| 6                | 6                | 0              | -2.210436               | 2.940417  | 1.355747  | 46               | 1                | 0              | -3.073107               | 4.526502  | 2.495291  |
| 7                | 6                | 0              | -3.987840               | -0.011125 | -0.123383 | 47               | 1                | 0              | -5.408381               | 3.662271  | 2.262448  |
| 8                | 6                | 0              | -2.926607               | -0.707578 | -0.748863 | 48               | 1                | 0              | -5.814109               | 1.551732  | 1.052653  |
| 9                | 6                | 0              | -1.591137               | -0.168646 | -0.743350 | 49               | 1                | 0              | -1.205815               | 3.314834  | 1.510906  |
| 10               | 6                | 0              | -1.303777               | 1.051050  | -0.024447 | 50               | 1                | 0              | -4.176910               | -2.349553 | -1.403532 |
| 11               | 6                | 0              | -3.172494               | -1.941749 | -1.427857 | 51               | 1                | 0              | -2.385521               | -3.527931 | -2.621614 |
| 12               | 6                | 0              | -2.176434               | -2.592630 | -2.110834 | 52               | 1                | 0              | -0.101675               | -2.512855 | -2.748122 |
| 13               | 6                | 0              | -0.881727               | -2.024703 | -2.171558 | 53               | 1                | 0              | 0.385119                | -0.426152 | -1.590668 |
| 14               | 6                | 0              | -0.606536               | -0.849056 | -1.512627 | 54               | 1                | 0              | 0.001273                | 2.717411  | 0.063835  |
| 15               | 6                | 0              | -0.003473               | 1.633007  | 0.032446  | 55               | 1                | 0              | 5.788312                | 1.551726  | -1.106862 |
| 16               | 6                | 0              | 1.304661                | 1.044397  | 0.059714  | 56               | 1                | 0              | 5.346380                | 3.645456  | -2.331952 |
| 17               | 6                | 0              | 1.603552                | -0.165453 | 0.780990  | 57               | 1                | 0              | 3.003530                | 4.496901  | -2.528410 |
| 18               | 6                | 0              | 2.942277                | -0.698969 | 0.773883  | 58               | 1                | 0              | 1.159401                | 3.286382  | -1.491953 |
| 19               | 6                | 0              | 3.990083                | -0.005548 | 0.125288  | 59               | 1                | 0              | -0.366429               | -0.431330 | 1.642649  |
| 20               | 6                | 0              | 3.728273                | 1.220244  | -0.528096 | 60               | 1                | 0              | 0.144180                | -2.509040 | 2.808806  |
| 21               | 6                | 0              | 2.386420                | 1.739604  | -0.586846 | 61               | 1                | 0              | 2.434056                | -3.508126 | 2.672352  |
| 22               | 6                | 0              | 4.780209                | 1.946518  | -1.168974 | 62               | 1                | 0              | 4.207556                | -2.329909 | 1.429210  |
| 23               | 6                | 0              | 4.532304                | 3.109228  | -1.853433 | 63               | 1                | 0              | -8.211887               | -0.577235 | -2.012424 |
| 24               | 6                | 0              | 3.206124                | 3.596025  | -1.956764 | 64               | 1                | 0              | -8.954840               | -2.066117 | -0.173647 |
| 25               | 6                | 0              | 2.170152                | 2.920819  | -1.355013 | 65               | 1                | 0              | -7.406177               | -2.607528 | 1.686064  |
| 26               | 6                | 0              | 0.627512                | -0.848791 | 1.561527  | 66               | 1                | 0              | 8.247182                | -0.527357 | 1.952271  |
| 27               | 6                | 0              | 0.915996                | -2.017835 | 2.223772  | 67               | 1                | 0              | 8.967041                | -2.037362 | 0.121575  |
| 28               | 6                | 0              | 2.215412                | -2.577730 | 2.156640  | 68               | 1                | 0              | 7.390747                | -2.610771 | -1.705015 |
| 29               | 6                | 0              | 3.201359                | -1.926941 | 1.460617  | 69               | 1                | 0              | 5.271708                | -2.453767 | -2.751873 |
| 30               | 6                | 0              | -5.370007               | -0.581871 | -0.139979 | 70               | 1                | 0              | 3.911336                | -2.252600 | -1.631831 |
| 31               | 6                | 0              | 5.375156                | -0.570000 | 0.126986  | 71               | 1                | 0              | 4.486808                | -0.875126 | -2.560565 |
| 32               | 6                | 0              | -6.243684               | -0.270714 | -1.201042 | 72               | 1                | 0              | 5.513489                | 1.652892  | 1.892490  |
| 33               | 6                | 0              | -7.533223               | -0.813871 | -1.197218 | 73               | 1                | 0              | 4.957679                | 0.263454  | 2.814516  |
| 34               | 6                | 0              | -7.951163               | -1.650641 | -0.164223 | 74               | 1                | 0              | 6.624418                | 0.837450  | 3.008602  |
| 35               | 6                | 0              | -7.080568               | -1.954465 | 0.880676  | 75               | 1                | 0              | -4.913031               | 0.216856  | -2.832065 |
| 36               | 6                | 0              | -5.784823               | -1.427331 | 0.908511  | 76               | 1                | 0              | -6.578464               | 0.782289  | -3.059562 |
| 37               | 6                | 0              | 6.264525                | -0.240647 | 1.169287  | 77               | 1                | 0              | -5.488001               | 1.616077  | -1.936843 |
| 38               | 6                | 0              | 7.556411                | -0.777959 | 1.151537  | 78               | 1                | 0              | -5.304844               | -2.426798 | 2.764952  |
| 39               | 6                | 0              | 7.961378                | -1.626611 | 0.123091  | 79               | 1                | 0              | -3.927187               | -2.232618 | 1.664991  |
| 40               | 6                | 0              | 7.075249                | -1.948419 | -0.903200 | 80               | 1                | 0              | -4.525406               | -0.846406 | 2.565982  |

Table S3. Cartesian coordinates of the DAntM radical (localization on the anthryl group)

| Center<br>Number | Atomic<br>Number | Atomic<br>Type | Coordinates (Angstroms) |           |           | Center<br>Number | Atomic<br>Number | Atomic<br>Type | Coordinates (Angstroms) |           |           |
|------------------|------------------|----------------|-------------------------|-----------|-----------|------------------|------------------|----------------|-------------------------|-----------|-----------|
|                  |                  |                | X                       | Y         | Z         |                  |                  |                | X                       | Y         | Z         |
| 1                | 6                | 0              | -3.251717               | 3.946950  | 1.154492  | 41               | 6                | 0              | 4.886489                | -1.833325 | -0.991037 |
| 2                | 6                | 0              | -4.520867               | 3.307601  | 1.222442  | 42               | 6                | 0              | 3.731571                | -1.876505 | -1.965071 |
| 3                | 6                | 0              | -4.675608               | 2.028879  | 0.756205  | 43               | 6                | 0              | 5.907651                | 0.099510  | 2.156071  |
| 4                | 6                | 0              | -3.580320               | 1.311170  | 0.176665  | 44               | 6                | 0              | -5.763604               | 0.127658  | -2.352733 |
| 5                | 6                | 0              | -2.298654               | 1.968238  | 0.084043  | 45               | 6                | 0              | -4.178703               | -1.533253 | 2.158824  |
| 6                | 6                | 0              | -2.177084               | 3.292959  | 0.611423  | 46               | 1                | 0              | -3.135501               | 4.954221  | 1.543590  |
| 7                | 6                | 0              | -3.723622               | -0.017622 | -0.271312 | 47               | 1                | 0              | -5.365800               | 3.834546  | 1.655877  |
| 8                | 6                | 0              | -2.630593               | -0.684790 | -0.862267 | 48               | 1                | 0              | -5.638468               | 1.533641  | 0.820794  |
| 9                | 6                | 0              | -1.353736               | -0.022092 | -0.985005 | 49               | 1                | 0              | -1.205427               | 3.775119  | 0.584741  |
| 10               | 6                | 0              | -1.188884               | 1.287311  | -0.467126 | 50               | 1                | 0              | -3.714175               | -2.524447 | -1.240196 |
| 11               | 6                | 0              | -2.755992               | -2.027673 | -1.346189 | 51               | 1                | 0              | -1.818879               | -3.691626 | -2.293498 |
| 12               | 6                | 0              | -1.701548               | -2.673828 | -1.933174 | 52               | 1                | 0              | 0.373617                | -2.519509 | -2.572643 |
| 13               | 6                | 0              | -0.452943               | -2.009754 | -2.086069 | 53               | 1                | 0              | 0.664300                | -0.232201 | -1.758066 |
| 14               | 6                | 0              | -0.288789               | -0.729434 | -1.629694 | 54               | 1                | 0              | 0.173730                | 2.836306  | -1.159795 |
| 15               | 6                | 0              | 0.127805                | 1.956303  | -0.521960 | 55               | 1                | 0              | 5.840651                | 1.234317  | -0.872578 |
| 16               | 6                | 0              | 1.294288                | 1.529914  | 0.056237  | 56               | 1                | 0              | 5.953673                | 3.559693  | -1.694694 |
| 17               | 6                | 0              | 1.369517                | 0.369551  | 0.954878  | 57               | 1                | 0              | 3.926888                | 5.014075  | -1.590731 |
| 18               | 6                | 0              | 2.557124                | -0.426406 | 0.954016  | 58               | 1                | 0              | 1.802703                | 4.107593  | -0.745375 |
| 19               | 6                | 0              | 3.709469                | 0.002218  | 0.225406  | 59               | 1                | 0              | -0.571650               | 0.629907  | 1.849247  |
| 20               | 6                | 0              | 3.752832                | 1.322977  | -0.321039 | 60               | 1                | 0              | -0.477607               | -1.422088 | 3.199217  |
| 21               | 6                | 0              | 2.576331                | 2.138982  | -0.332415 | 61               | 1                | 0              | 1.527856                | -2.906916 | 3.077453  |
| 22               | 6                | 0              | 4.956903                | 1.862876  | -0.850726 | 62               | 1                | 0              | 3.462049                | -2.246372 | 1.690598  |
| 23               | 6                | 0              | 5.018465                | 3.164560  | -1.309284 | 63               | 1                | 0              | -7.988391               | -1.296334 | -1.665503 |
| 24               | 6                | 0              | 3.875245                | 3.981158  | -1.260179 | 64               | 1                | 0              | -8.389607               | -2.598946 | 0.406095  |
| 25               | 6                | 0              | 2.676890                | 3.465490  | -0.785694 | 65               | 1                | 0              | -6.640695               | -2.709267 | 2.160445  |
| 26               | 6                | 0              | 0.305632                | -0.002243 | 1.795589  | 66               | 1                | 0              | 7.839760                | -1.728575 | 1.541802  |
| 27               | 6                | 0              | 0.358515                | -1.160647 | 2.557691  | 67               | 1                | 0              | 7.877176                | -3.337540 | -0.344481 |
| 28               | 6                | 0              | 1.491544                | -1.990428 | 2.495840  | 68               | 1                | 0              | 5.991472                | -3.407958 | -1.953270 |
| 29               | 6                | 0              | 2.571990                | -1.627010 | 1.715360  | 69               | 1                | 0              | 3.893783                | -2.630783 | -2.739645 |
| 30               | 6                | 0              | -5.025663               | -0.731517 | -0.089864 | 70               | 1                | 0              | 2.790627                | -2.107070 | -1.452491 |
| 31               | 6                | 0              | 4.876551                | -0.914980 | 0.078933  | 71               | 1                | 0              | 3.593177                | -0.906667 | -2.455875 |
| 32               | 6                | 0              | -6.013624               | -0.664904 | -1.091664 | 72               | 1                | 0              | 5.879521                | 1.134933  | 1.799659  |
| 33               | 6                | 0              | -7.221789               | -1.343665 | -0.896569 | 73               | 1                | 0              | 5.011250                | -0.047622 | 2.768254  |
| 34               | 6                | 0              | -7.447621               | -2.075946 | 0.267329  | 74               | 1                | 0              | 6.784158                | -0.016539 | 2.798828  |
| 35               | 6                | 0              | -6.464289               | -2.137624 | 1.253088  | 75               | 1                | 0              | -4.882658               | -0.247238 | -2.884959 |
| 36               | 6                | 0              | -5.245606               | -1.469899 | 1.090533  | 76               | 1                | 0              | -6.620264               | 0.077407  | -3.029863 |
| 37               | 6                | 0              | 5.940578                | -0.874672 | 1.002214  | 77               | 1                | 0              | -5.568160               | 1.180996  | -2.124188 |
| 38               | 6                | 0              | 7.015826                | -1.754447 | 0.833533  | 78               | 1                | 0              | -4.496214               | -2.156124 | 2.999191  |
| 39               | 6                | 0              | 7.036441                | -2.660002 | -0.225456 | 79               | 1                | 0              | -3.243399               | -1.942024 | 1.760933  |
| 40               | 6                | 0              | 5.976477                | -2.698924 | -1.129707 | 80               | 1                | 0              | -3.946747               | -0.533211 | 2.541664  |

Table S4. Cartesian coordinates of the DAntM dimer

| Center<br>Number | Atomic<br>Number | Atomic<br>Type | Coordinates (Angstroms) |           |           | Center<br>Number | Atomic<br>Number | Atomic<br>Type | Coordinates (Angstroms) |           |           |
|------------------|------------------|----------------|-------------------------|-----------|-----------|------------------|------------------|----------------|-------------------------|-----------|-----------|
|                  |                  |                | X                       | Y         | Z         |                  |                  |                | X                       | Y         | Z         |
| 1                | 6                | 0              | 3.149975                | -0.659105 | 3.223149  | 41               | 6                | 0              | 2.186540                | 3.662207  | 3.555591  |
| 2                | 6                | 0              | 4.384364                | -1.329794 | 3.025462  | 42               | 6                | 0              | 0.914079                | 3.060575  | 3.365698  |
| 3                | 6                | 0              | 4.598759                | -2.007161 | 1.857355  | 43               | 6                | 0              | 0.627672                | 2.387632  | 2.208352  |
| 4                | 6                | 0              | 3.601812                | -2.071719 | 0.829943  | 44               | 6                | 0              | -0.024272               | 0.742108  | -0.287486 |
| 5                | 6                | 0              | 2.332502                | -1.401603 | 1.019789  | 45               | 6                | 0              | -1.327246               | 1.583478  | -0.112172 |
| 6                | 6                | 0              | 2.176342                | -0.694471 | 2.261047  | 46               | 6                | 0              | -1.585280               | 2.531183  | -1.147110 |
| 7                | 6                | 0              | 3.858139                | -2.787213 | -0.353721 | 47               | 6                | 0              | -2.854624               | 3.217869  | -1.230375 |
| 8                | 6                | 0              | 2.866000                | -2.868394 | -1.344644 | 48               | 6                | 0              | -3.850442               | 2.981719  | -0.267302 |
| 9                | 6                | 0              | 1.577987                | -2.235351 | -1.148064 | 49               | 6                | 0              | -3.589265               | 2.106365  | 0.799829  |
| 10               | 6                | 0              | 1.313306                | -1.483608 | 0.023576  | 50               | 6                | 0              | -2.320581               | 1.406322  | 0.893943  |
| 11               | 6                | 0              | 3.124985                | -3.573227 | -2.565297 | 51               | 6                | 0              | -4.592605               | 1.906003  | 1.805099  |
| 12               | 6                | 0              | 2.186409                | -3.662458 | -3.555461 | 52               | 6                | 0              | -4.385336               | 1.089349  | 2.880143  |
| 13               | 6                | 0              | 0.913943                | -3.060837 | -3.365557 | 53               | 6                | 0              | -3.140360               | 0.422687  | 3.007600  |
| 14               | 6                | 0              | 0.627552                | -2.387873 | -2.208219 | 54               | 6                | 0              | -2.165598               | 0.578362  | 2.059877  |
| 15               | 6                | 0              | -0.024321               | -0.742208 | 0.287531  | 55               | 6                | 0              | -0.633966               | 2.834111  | -2.178892 |
| 16               | 6                | 0              | -1.327334               | -1.583515 | 0.112182  | 56               | 6                | 0              | -0.908499               | 3.705955  | -3.200222 |
| 17               | 6                | 0              | -1.585433               | -2.531192 | 1.147131  | 57               | 6                | 0              | -2.165257               | 4.359355  | -3.278904 |
| 18               | 6                | 0              | -2.854806               | -3.217826 | 1.230379  | 58               | 6                | 0              | -3.104522               | 4.120272  | -2.314316 |
| 19               | 6                | 0              | -3.850592               | -2.981651 | 0.267280  | 59               | 6                | 0              | 5.177117                | 3.468815  | 0.547676  |
| 20               | 6                | 0              | -3.589357               | -2.106323 | -0.799857 | 60               | 6                | 0              | -5.178226               | 3.665581  | -0.372624 |
| 21               | 6                | 0              | -2.320643               | -1.406330 | -0.893957 | 61               | 6                | 0              | -5.178410               | -3.665451 | 0.372585  |
| 22               | 6                | 0              | -4.592670               | -1.905940 | -1.805150 | 62               | 6                | 0              | 5.177092                | -3.468831 | -0.547678 |
| 23               | 6                | 0              | -4.385351               | -1.089314 | -2.880205 | 63               | 6                | 0              | 6.228360                | 2.786579  | 1.191820  |
| 24               | 6                | 0              | -3.140349               | -0.422699 | -3.007646 | 64               | 6                | 0              | 7.456158                | 3.437521  | 1.356137  |
| 25               | 6                | 0              | -2.165612               | -0.578392 | -2.059902 | 65               | 6                | 0              | 7.640732                | 4.739113  | 0.893994  |
| 26               | 6                | 0              | -0.634160               | -2.834135 | 2.178944  | 66               | 6                | 0              | 6.594497                | 5.407540  | 0.260856  |
| 27               | 6                | 0              | -0.908749               | -3.705957 | 3.200279  | 67               | 6                | 0              | 5.353994                | 4.786147  | 0.079255  |
| 28               | 6                | 0              | -2.165528               | -4.359317 | 3.278934  | 68               | 6                | 0              | -5.354930               | 4.940658  | 0.200608  |
| 29               | 6                | 0              | -3.104762               | -4.120210 | 2.314322  | 69               | 6                | 0              | -6.603926               | 5.562643  | 0.094086  |
| 30               | 6                | 0              | 3.150000                | 0.659048  | -3.223115 | 70               | 6                | 0              | -7.658742               | 4.935211  | -0.566051 |
| 31               | 6                | 0              | 4.384396                | 1.329722  | -3.025427 | 71               | 6                | 0              | -7.475298               | 3.673615  | -1.128856 |
| 32               | 6                | 0              | 4.598802                | 2.007081  | -1.857317 | 72               | 6                | 0              | -6.239493               | 3.023214  | -1.041268 |
| 33               | 6                | 0              | 3.601875                | 2.071598  | -0.829882 | 73               | 6                | 0              | 5.354209                | -4.786046 | -0.079017 |
| 34               | 6                | 0              | 2.332567                | 1.401475  | -1.019720 | 74               | 6                | 0              | 6.594756                | -5.407325 | -0.260703 |
| 35               | 6                | 0              | 2.176375                | 0.694403  | -2.261004 | 75               | 6                | 0              | 7.640800                | -4.738904 | -0.894162 |
| 36               | 6                | 0              | 3.858209                | 2.787085  | 0.353785  | 76               | 6                | 0              | 7.455988                | -3.437431 | -1.356544 |
| 37               | 6                | 0              | 2.866095                | 2.868206  | 1.344740  | 77               | 6                | 0              | 6.228141                | -2.786601 | -1.192145 |
| 38               | 6                | 0              | 1.578088                | 2.235143  | 1.148175  | 78               | 6                | 0              | -6.239666               | -3.023014 | 1.041179  |
| 39               | 6                | 0              | 1.313387                | 1.483444  | -0.023488 | 79               | 6                | 0              | -7.475508               | -3.673349 | 1.128743  |
| 40               | 6                | 0              | 3.125097                | 3.573013  | 2.565405  | 80               | 6                | 0              | -7.658996               | -4.934951 | 0.565965  |

| Center<br>Number | Atomic<br>Number | Atomic<br>Type | Coordinates (Angstroms) |           |           | Center<br>Number | Atomic<br>Number | Atomic<br>Type | Coordinates (Angstroms) |           |           |
|------------------|------------------|----------------|-------------------------|-----------|-----------|------------------|------------------|----------------|-------------------------|-----------|-----------|
|                  |                  |                | X                       | Y         | Z         |                  |                  |                | X                       | Y         | Z         |
| 81               | 6                | 0              | -6.604191               | -5.562455 | -0.094119 | 121              | 1                | 0              | 0.350035                | 2.396877  | -2.155005 |
| 82               | 6                | 0              | -5.355160               | -4.940536 | -0.200617 | 122              | 1                | 0              | -0.147836               | 3.902841  | -3.950216 |
| 83               | 6                | 0              | 4.219984                | 5.507445  | -0.609905 | 123              | 1                | 0              | -2.374569               | 5.046272  | -4.093423 |
| 84               | 6                | 0              | 6.018082                | 1.383952  | 1.704613  | 124              | 1                | 0              | -4.069404               | 4.613122  | -2.353938 |
| 85               | 6                | 0              | -4.211397               | -5.617724 | -0.917829 | 125              | 1                | 0              | 8.271150                | 2.916165  | 1.851313  |
| 86               | 6                | 0              | -6.036235               | -1.656149 | 1.646541  | 126              | 1                | 0              | 8.599146                | 5.232857  | 1.027671  |
| 87               | 6                | 0              | 6.017591                | -1.384132 | -1.705264 | 127              | 1                | 0              | 6.737612                | 6.423270  | -0.098303 |
| 88               | 6                | 0              | 4.220411                | -5.507335 | 0.610503  | 128              | 1                | 0              | -6.747066               | 6.545922  | 0.534359  |
| 89               | 6                | 0              | -6.036107               | 1.656362  | -1.646672 | 129              | 1                | 0              | -8.623408               | 5.429115  | -0.641272 |
| 90               | 6                | 0              | -4.211156               | 5.617771  | 0.917873  | 130              | 1                | 0              | -8.297828               | 3.183637  | -1.643235 |
| 91               | 1                | 0              | 2.973415                | -0.099684 | 4.136819  | 131              | 1                | 0              | 6.738055                | -6.422963 | 0.098644  |
| 92               | 1                | 0              | 5.153514                | -1.295340 | 3.790904  | 132              | 1                | 0              | 8.599251                | -5.232559 | -1.027902 |
| 93               | 1                | 0              | 5.539669                | -2.517226 | 1.685445  | 133              | 1                | 0              | 8.270832                | -2.916078 | -1.851967 |
| 94               | 1                | 0              | 1.270330                | -0.145041 | 2.465530  | 134              | 1                | 0              | -8.298030               | -3.183315 | 1.643080  |
| 95               | 1                | 0              | 4.097776                | -4.035852 | -2.688774 | 135              | 1                | 0              | -8.623691               | -5.428803 | 0.641166  |
| 96               | 1                | 0              | 2.406589                | -4.195578 | -4.475527 | 136              | 1                | 0              | -6.747365               | -6.545739 | -0.534368 |
| 97               | 1                | 0              | 0.154878                | -3.139034 | -4.138563 | 137              | 1                | 0              | 4.509130                | 6.523057  | -0.892351 |
| 98               | 1                | 0              | -0.352854               | -1.966026 | -2.099862 | 138              | 1                | 0              | 3.907394                | 4.975611  | -1.515241 |
| 99               | 1                | 0              | 0.000137                | -0.598612 | 1.356590  | 139              | 1                | 0              | 3.339064                | 5.568247  | 0.038026  |
| 100              | 1                | 0              | -5.531568               | -2.436146 | -1.695453 | 140              | 1                | 0              | 5.679421                | 0.710060  | 0.912082  |
| 101              | 1                | 0              | -5.158745               | -0.955667 | -3.630112 | 141              | 1                | 0              | 6.935117                | 0.971531  | 2.133333  |
| 102              | 1                | 0              | -2.949956               | 0.221269  | -3.860941 | 142              | 1                | 0              | 5.238103                | 1.355793  | 2.472077  |
| 103              | 1                | 0              | -1.236640               | -0.067794 | -2.239314 | 143              | 1                | 0              | -4.515082               | -6.586535 | -1.322832 |
| 104              | 1                | 0              | 0.349854                | -2.396930 | 2.155085  | 144              | 1                | 0              | -3.843302               | -5.000014 | -1.744140 |
| 105              | 1                | 0              | -0.148111               | -3.902856 | 3.950296  | 145              | 1                | 0              | -3.362892               | -5.778468 | -0.244002 |
| 106              | 1                | 0              | -2.374883               | -5.046222 | 4.093454  | 146              | 1                | 0              | -6.940561               | -1.302409 | 2.148624  |
| 107              | 1                | 0              | -4.069662               | -4.613025 | 2.353926  | 147              | 1                | 0              | -5.217892               | -1.661308 | 2.373127  |
| 108              | 1                | 0              | 2.973422                | 0.099655  | -4.136798 | 148              | 1                | 0              | -5.757465               | -0.917880 | 0.887486  |
| 109              | 1                | 0              | 5.153532                | 1.295290  | -3.790885 | 149              | 1                | 0              | 6.934704                | -0.971406 | -2.133523 |
| 110              | 1                | 0              | 5.539699                | 2.517174  | -1.685421 | 150              | 1                | 0              | 5.238051                | -1.356423 | -2.473201 |
| 111              | 1                | 0              | 1.270346                | 0.145006  | -2.465501 | 151              | 1                | 0              | 5.678167                | -0.710253 | -0.913055 |
| 112              | 1                | 0              | 4.097889                | 4.035635  | 2.688879  | 152              | 1                | 0              | 4.509655                | -6.522935 | 0.892895  |
| 113              | 1                | 0              | 2.406732                | 4.195304  | 4.475667  | 153              | 1                | 0              | 3.908088                | -4.975479 | 1.515919  |
| 114              | 1                | 0              | 0.155025                | 3.138752  | 4.138718  | 154              | 1                | 0              | 3.339298                | -5.568165 | -0.037161 |
| 115              | 1                | 0              | -0.352732               | 1.965775  | 2.100008  | 155              | 1                | 0              | -5.757279               | 0.918078  | -0.887654 |
| 116              | 1                | 0              | 0.000215                | 0.598521  | -1.356547 | 156              | 1                | 0              | -6.940468               | 1.302633  | -2.148698 |
| 117              | 1                | 0              | -5.531482               | 2.436244  | 1.695391  | 157              | 1                | 0              | -5.217816               | 1.661538  | -2.373318 |
| 118              | 1                | 0              | -5.158750               | 0.955718  | 3.630033  | 158              | 1                | 0              | -4.514809               | 6.586579  | 1.322905  |
| 119              | 1                | 0              | -2.950007               | -0.221301 | 3.860888  | 159              | 1                | 0              | -3.843105               | 5.000015  | 1.744169  |
| 120              | 1                | 0              | -1.236645               | 0.067729  | 2.239295  | 160              | 1                | 0              | -3.362629               | 5.778505  | 0.244071  |

Table S5. Cartesian coordinates of the DantM cation

| Center<br>Number | Atomic<br>Number | Atomic<br>Type | Coordinates (Angstroms) |           |           | Center<br>Number | Atomic<br>Number | Atomic<br>Type | Coordinates (Angstroms) |           |           |
|------------------|------------------|----------------|-------------------------|-----------|-----------|------------------|------------------|----------------|-------------------------|-----------|-----------|
|                  |                  |                | X                       | Y         | Z         |                  |                  |                | X                       | Y         | Z         |
| 1                | 6                | 0              | -3.121460               | 3.596904  | 1.898735  | 41               | 6                | 0              | 5.930591                | -1.286584 | -0.942167 |
| 2                | 6                | 0              | -4.466945               | 3.182946  | 1.782525  | 42               | 6                | 0              | 5.021641                | -1.666431 | -2.087602 |
| 3                | 6                | 0              | -4.758344               | 2.012777  | 1.125746  | 43               | 6                | 0              | 5.767969                | 0.742268  | 2.316334  |
| 4                | 6                | 0              | -3.727000               | 1.224562  | 0.532117  | 44               | 6                | 0              | -5.767749               | 0.741911  | -2.316585 |
| 5                | 6                | 0              | -2.361878               | 1.667675  | 0.607401  | 45               | 6                | 0              | -5.021826               | -1.666145 | 2.087771  |
| 6                | 6                | 0              | -2.100453               | 2.848776  | 1.348678  | 46               | 1                | 0              | -2.883255               | 4.505011  | 2.443785  |
| 7                | 6                | 0              | -4.042399               | -0.006466 | -0.091524 | 47               | 1                | 0              | -5.259150               | 3.775498  | 2.227392  |
| 8                | 6                | 0              | -3.025278               | -0.789257 | -0.690346 | 48               | 1                | 0              | -5.780839               | 1.661336  | 1.053692  |
| 9                | 6                | 0              | -1.655396               | -0.346757 | -0.679696 | 49               | 1                | 0              | -1.079965               | 3.168893  | 1.520824  |
| 10               | 6                | 0              | -1.305422               | 0.881237  | 0.003146  | 50               | 1                | 0              | -4.400886               | -2.329930 | -1.333253 |
| 11               | 6                | 0              | -3.365429               | -2.011064 | -1.346309 | 51               | 1                | 0              | -2.685132               | -3.682807 | -2.492213 |
| 12               | 6                | 0              | -2.414003               | -2.756377 | -1.997269 | 52               | 1                | 0              | -0.333546               | -2.850413 | -2.594175 |
| 13               | 6                | 0              | -1.082439               | -2.288410 | -2.044758 | 53               | 1                | 0              | 0.304852                | -0.782620 | -1.490632 |
| 14               | 6                | 0              | -0.718853               | -1.118067 | -1.411367 | 54               | 1                | 0              | 0.000015                | 2.518492  | 0.000121  |
| 15               | 6                | 0              | -0.000000               | 1.433156  | 0.000091  | 55               | 1                | 0              | 5.780749                | 1.661189  | -1.054025 |
| 16               | 6                | 0              | 1.305419                | 0.881208  | -0.003029 | 56               | 1                | 0              | 5.258959                | 3.775282  | -2.227816 |
| 17               | 6                | 0              | 1.655416                | -0.346769 | 0.679827  | 57               | 1                | 0              | 2.883075                | 4.504858  | -2.443947 |
| 18               | 6                | 0              | 3.025315                | -0.789219 | 0.690499  | 58               | 1                | 0              | 1.079842                | 3.168830  | -1.520669 |
| 19               | 6                | 0              | 4.042401                | -0.006474 | 0.091557  | 59               | 1                | 0              | -0.304844               | -0.782718 | 1.490698  |
| 20               | 6                | 0              | 3.726960                | 1.224496  | -0.532175 | 60               | 1                | 0              | 0.333638                | -2.850408 | 2.594377  |
| 21               | 6                | 0              | 2.361842                | 1.667627  | -0.607356 | 61               | 1                | 0              | 2.685286                | -3.682628 | 2.492616  |
| 22               | 6                | 0              | 4.758254                | 2.012649  | -1.125983 | 62               | 1                | 0              | 4.400995                | -2.329757 | 1.333572  |
| 23               | 6                | 0              | 4.466799                | 3.182778  | -1.782802 | 63               | 1                | 0              | -8.268726               | -0.301620 | -2.013683 |
| 24               | 6                | 0              | 3.121308                | 3.596774  | -1.898869 | 64               | 1                | 0              | -9.125139               | -1.715104 | -0.167534 |
| 25               | 6                | 0              | 2.100351                | 2.848703  | -1.348653 | 65               | 1                | 0              | -7.637037               | -2.341379 | 1.712273  |
| 26               | 6                | 0              | 0.718887                | -1.118099 | 1.411492  | 66               | 1                | 0              | 8.268945                | -0.301245 | 2.013316  |
| 27               | 6                | 0              | 1.082522                | -2.288382 | 2.044969  | 67               | 1                | 0              | 9.125192                | -1.714977 | 0.167277  |
| 28               | 6                | 0              | 2.414118                | -2.756260 | 1.997577  | 68               | 1                | 0              | 7.636893                | -2.341587 | -1.712260 |
| 29               | 6                | 0              | 3.365519                | -2.010947 | 1.346582  | 69               | 1                | 0              | 5.543365                | -2.292611 | -2.814379 |
| 30               | 6                | 0              | -5.457860               | -0.483014 | -0.115000 | 70               | 1                | 0              | 4.144703                | -2.220162 | -1.733375 |
| 31               | 6                | 0              | 5.457870                | -0.483007 | 0.114979  | 71               | 1                | 0              | 4.650009                | -0.779214 | -2.612615 |
| 32               | 6                | 0              | -6.292071               | -0.118792 | -1.191281 | 72               | 1                | 0              | 5.414364                | 1.711196  | 1.946408  |
| 33               | 6                | 0              | -7.614487               | -0.574602 | -1.190879 | 73               | 1                | 0              | 4.921230                | 0.264867  | 2.822173  |
| 34               | 6                | 0              | -8.096153               | -1.369573 | -0.152800 | 74               | 1                | 0              | 6.542428                | 0.930324  | 3.062836  |
| 35               | 6                | 0              | -7.259224               | -1.721783 | 0.904213  | 75               | 1                | 0              | -4.921082               | 0.264356  | -2.822401 |
| 36               | 6                | 0              | -5.930681               | -1.286441 | 0.942214  | 76               | 1                | 0              | -6.542193               | 0.930008  | -3.063093 |
| 37               | 6                | 0              | 6.292193                | -0.118595 | 1.191105  | 77               | 1                | 0              | -5.414009               | 1.710822  | -1.946745 |
| 38               | 6                | 0              | 7.614623                | -0.574367 | 1.190624  | 78               | 1                | 0              | -5.543704               | -2.291952 | 2.814758  |
| 39               | 6                | 0              | 8.096193                | -1.369478 | 0.152608  | 79               | 1                | 0              | -4.145045               | -2.220233 | 1.733706  |
| 40               | 6                | 0              | 7.259153                | -1.721875 | -0.904254 | 80               | 1                | 0              | -4.649941               | -0.778864 | 2.612490  |

Table S6. Cartesian coordinates of anthroxyl radical **5**

| Center<br>Number | Atomic<br>Number | Atomic<br>Type | Coordinates (Angstroms) |           |           |
|------------------|------------------|----------------|-------------------------|-----------|-----------|
|                  |                  |                | X                       | Y         | Z         |
| 1                | 6                | 0              | 3.683603                | -0.000000 | 1.938640  |
| 2                | 6                | 0              | 3.681188                | -0.000000 | 0.532527  |
| 3                | 6                | 0              | 2.487114                | -0.000000 | -0.167507 |
| 4                | 6                | 0              | 1.241656                | -0.000000 | 0.515662  |
| 5                | 6                | 0              | 1.259080                | -0.000000 | 1.942388  |
| 6                | 6                | 0              | 2.478677                | -0.000000 | 2.630155  |
| 7                | 6                | 0              | 0.000000                | 0.000000  | -0.197189 |
| 8                | 6                | 0              | -1.241656               | 0.000000  | 0.515662  |
| 9                | 6                | 0              | -1.259080               | 0.000000  | 1.942388  |
| 10               | 6                | 0              | 0.000000                | -0.000000 | 2.717188  |
| 11               | 6                | 0              | -2.487114               | 0.000000  | -0.167507 |
| 12               | 6                | 0              | -3.681188               | 0.000000  | 0.532527  |
| 13               | 6                | 0              | -3.683603               | 0.000000  | 1.938640  |
| 14               | 6                | 0              | -2.478677               | 0.000000  | 2.630155  |
| 15               | 8                | 0              | 0.000000                | -0.000000 | 3.954199  |
| 16               | 6                | 0              | -0.000000               | 0.000000  | -1.689778 |
| 17               | 6                | 0              | -0.000000               | -1.225677 | -2.385819 |
| 18               | 6                | 0              | -0.000000               | -1.206811 | -3.784756 |
| 19               | 6                | 0              | -0.000000               | 0.000000  | -4.481523 |
| 20               | 6                | 0              | -0.000000               | 1.206811  | -3.784756 |
| 21               | 6                | 0              | 0.000000                | 1.225677  | -2.385819 |
| 22               | 6                | 0              | -0.000000               | -2.531589 | -1.626997 |
| 23               | 6                | 0              | 0.000000                | 2.531589  | -1.626997 |
| 24               | 1                | 0              | 4.624164                | -0.000000 | 2.480976  |
| 25               | 1                | 0              | 4.622026                | -0.000000 | -0.010088 |
| 26               | 1                | 0              | 2.489336                | -0.000000 | -1.252137 |
| 27               | 1                | 0              | 2.445141                | -0.000000 | 3.714534  |
| 28               | 1                | 0              | -2.489336               | 0.000000  | -1.252137 |
| 29               | 1                | 0              | -4.622026               | 0.000000  | -0.010088 |
| 30               | 1                | 0              | -4.624164               | 0.000000  | 2.480976  |
| 31               | 1                | 0              | -2.445141               | 0.000000  | 3.714534  |
| 32               | 1                | 0              | -0.000000               | -2.147764 | -4.328363 |
| 33               | 1                | 0              | -0.000000               | 0.000000  | -5.567724 |
| 34               | 1                | 0              | 0.000000                | 2.147764  | -4.328363 |
| 35               | 1                | 0              | -0.879104               | -2.611480 | -0.978175 |
| 36               | 1                | 0              | -0.000000               | -3.386358 | -2.307976 |
| 37               | 1                | 0              | 0.879104                | -2.611480 | -0.978175 |
| 38               | 1                | 0              | 0.000000                | 3.386358  | -2.307976 |
| 39               | 1                | 0              | -0.879104               | 2.611480  | -0.978175 |
| 40               | 1                | 0              | 0.879104                | 2.611480  | -0.978175 |

## References

- [S1] Zhen, C. –J.; Lu, S. –F.; Lin, M. –H.; Wu, J. –T.; Chao, I.; Lin, C. –H. *Chem. Eur. J.* **2021**, 27, 16682-16689.
- [S2] Lü, J. –M.; Rosokha, S. V.; Kochi, J. K. *J. Am. Chem. Soc.* **2003**, 125, 12161-12171.
